# Supplementary material
Source: PubMed Central journal article supplement (PMC9134263)
Supplement: NIHMS1795685-supplement-Supplemental_Publication_Material.pdf [file NIHMS1795685-supplement-Supplemental_Publication_Material.pdf]

## SUPPLEMENTAL MATERIAL

### Expanded Methods in the Supplemental Data

#### Mortality Assessment

The underlying causes of death were identified using codes from the *International Classification of Diseases* (ICD-8, -9, -10, respectively): CVD (ICD-8: 390-458; ICD-9: 390-459; ICD-10: I00-I99), heart disease (ICD-8 and ICD-9: 390-398, 401-404, 410-429, and 440-448; ICD-10: I00-I13, I20-I51, and I70-I78), stroke (ICD-8 and ICD-9: 430-438; ICD-10: I60-I69), cancer (ICD-8 and ICD-9: 140-239; ICD-10: C00-D48).

#### Statistical Analysis

We conducted stratified analyses of overall and CVD mortality based on other exposure variables including age at baseline (< 57, or  $\geq$  57 years), number of cigarettes smoked per day (<16, 16 to <20, or  $\geq$ 20), BMI (<30, or  $\geq$ 30 kg/m<sup>2</sup>), history of cardiovascular disease (no, or yes), intervention group (alpha-tocopherol/no alpha-tocopherol, beta-carotene/no beta-carotene), high quality diet (no [quartiles of 1 to 3], or yes [quartiles of 4]; based on the Alternate Mediterranean Diet Score, **Table I in the Supplemental Data**), total energy intake (<2,589, or  $\geq$ 2,589 kcal; median split), saturated fatty acid intake (low or medium [quartiles 1-3], or high [quartiles 4]), serum cholesterol (<205, or  $\geq$ 205 mg/dL; median split) (for dietary cholesterol or egg consumption as the primary exposure variable), dietary cholesterol (<538, or  $\geq$ 538 mg; median split), serum alpha-tocopherol (<11.5, or  $\geq$ 11.5 mg/L; median split), serum beta-carotene (<172, or  $\geq$ 172  $\mu$ g/L; median split), serum retinol (<577, or  $\geq$ 577  $\mu$ g/L; median split), follow-up period (0 to <13, 13 to  $\leq$ 23,  $\geq$ 23 years). We used likelihood

ratio tests to estimate P values for interactions, by comparing regression models with and without the cross-product terms of the stratified factors and exposure variables including dietary cholesterol, serum total cholesterol or egg consumption.

### **Systematic review and meta-analysis of associations between egg consumption and risk of CVD and CVD mortality**

We primarily used the risk estimate for overall CVD when available. For the studies that reported risk estimates for CHD and stroke separately, but not for overall CVD, risk estimates for CHD and stroke were pooled in fixed effects meta-analysis models. We used the same approach for stroke, primarily using overall stroke risk when the data were available. For studies that separately reported risk estimates for hemorrhagic stroke and ischemic stroke, risk estimates of these two were also pooled using fixed effects meta-analysis models. Therefore, the pooled risk estimates of overall CVD (or overall stroke) were used in our meta-analysis. If there were two studies using the same cohort/study population, and conducted similar analyses for the same CVD endpoint, we selected the larger study of longer follow-up and greater event numbers to include in our meta-analysis (e.g., the Chen and Sun studies of the WHI cohort: risk estimate of CVD mortality was from Sun's study; Zhong study and Djousse study 2021: they have partially overlapping study populations, and risk estimates of ARIC, JHS, MESA were omitted from Djousse study). If there were two studies using the same cohort/study population and conducted analyses for different CVD endpoints, and if there were no overlapping endpoints in the two studies, we included the two studies separately, because the study design and included covariates in the models could differ substantially (i.e.,

fixed effects meta-analysis to pool as one estimate is not an appropriate approach in this case). Repeated risk estimates from the same population were excluded to minimize the over-weighting of participants in the meta-analysis.

## **Expanded Results in the Supplemental Data**

### **Baseline Characteristics**

Higher intake was also related to increased cigarette smoking and dietary energy, saturated fatty acids, alcohol, fruit, vegetables, and red meat, and with a lower Alternate Mediterranean Diet Score (**Table I in the Supplemental Data**). As compared with men with the lowest serum total cholesterol, men in higher quintiles were less educated and likely to be diabetic, and serum cholesterol was positively associated with serum alpha-tocopherol, beta-carotene and retinol, and dietary saturated fatty acids and red meat. Greater egg consumption was related to lower CVD prevalence, and increased dietary energy, saturated fatty acids, alcohol, fruit, vegetables, and red meat (**Table 1**).

### **Sensitivity Analysis**

Propensity score adjustment did not materially change the risk estimates of dietary cholesterol, serum total cholesterol or egg consumption with overall and cause-specific mortality: overall and CVD mortality HRs [95% CIs] of 1.07 [1.04, 1.10] and 1.09 [1.04, 1.14] for each additional 300 mg dietary cholesterol consumed per day; 1.01 [0.99, 1.03] and 1.10 [1.07, 1.13] for each 1-SD increment of serum total cholesterol; 1.06 [1.03, 1.08] and 1.07 [1.04, 1.11] for each additional 50 g egg consumed per day; **Table III in the Supplemental Data**). All risk estimates remained essentially the same in the lag analyses;

e.g., excluding the first 5 years of follow-up, HRs [95% CIs] for CVD mortality per 300 mg increment of dietary cholesterol, 1-SD increment of serum total cholesterol and 50 g increment of egg consumption were 1.14 [1.09, 1.19], 1.13 [1.10, 1.16], and 1.09 [1.06, 1.13], respectively (all P values<0.0001; **Table IV in the Supplemental Data**). Excluding participants with self-reported CVD histories also did not alter the observed associations (for the same increments of dietary cholesterol, serum total cholesterol and egg consumption, CVD mortality HRs [95% CIs] were 1.14 [1.09, 1.19], 1.14 [1.11, 1.18] and 1.09 [1.05, 1.13]; all P values<0.0001; **Table V in the Supplemental Data**). Our findings remained essentially unchanged using parsimonious models (**Table VI in the Supplemental Data**) or Winsorized distributions of dietary cholesterol, serum total cholesterol and egg at the 0.5 and 99.5 percentiles (**Table VII in the Supplemental Data**). The multivariable-adjusted HRs and corresponding 95% CIs of overall and CVD mortality according to gradual increment units for dietary cholesterol, serum total cholesterol and egg consumption are presented in the **Tables VIII-X in the Supplemental Data**. Our findings remained largely unchanged according to the quintiles of exposure variables (CVD mortality for dietary cholesterol, serum total cholesterol and egg consumption in the multivariate model, fifth versus first quintile, HRs [95% CIs]=1.18 [1.06, 1.31], 1.40 [1.29, 1.52] and 1.15 [1.06, 1.24], P for trend=0.003, <0.0001 and 0.0013, respectively; **Table XI in the Supplemental Data**). Quintile models for dietary cholesterol and egg consumption were further adjusted for energy intake using the nutrient density method, and our findings were not materially altered (CVD mortality for dietary cholesterol and egg consumption in the multivariate model, fifth versus first quintile,

HRs [95% CIs]= 1.19 [1.10, 1.29] and 1.18 [1.10, 1.27], and P for trend=0.0001 and 0.0002, respectively; **Table XII in the Supplemental Data**). Our findings remained essentially unchanged after further adjustment for specific foods including vegetables, fruit, legumes, whole grains, red and processed meat, fish and potatoes (all-cause and CVD mortality for egg consumption, fifth versus first quintile, HRs [95% CIs]=1.07 [1.05, 1.10], and 1.09 [1.06, 1.13], P for trend<0.0001, respectively; **Supplemental Table XIII**).

**Supplemental Table I.** Score criteria for Alternate Mediterranean Diet Score \*

| <b>Dietary component</b>                           | <b>Minimum score of 1 (median intake)</b> | <b>Maximum score of 5 (median intake)</b> |
|----------------------------------------------------|-------------------------------------------|-------------------------------------------|
| Vegetables (without potatoes), g/1000 kcal per day | First quintile (3.4)                      | Fifth quintile (18.2)                     |
| Fruit, g/1000 kcal per day                         | First quintile (2.5)                      | Fifth quintile (22.8)                     |
| Whole grains, g/1000 kcal per day                  | First quintile (0.06)                     | Fifth quintile (0.95)                     |
| Legumes, g/1000 kcal per day †                     | First quintile (0.07)                     | Fifth quintile (1.05)                     |
| Red and processed meat, g/1000 kcal per day        | Fifth quintile (19.6)                     | First quintile (7.5)                      |
| Fish, g/1000 kcal per day                          | First quintile (1.06)                     | Fifth quintile (6.9)                      |
| Ratio of monounsaturated to saturated fatty acids  | First quintile (0.49)                     | Fifth quintile (0.87)                     |
| Alcohol, g/1000 kcal per day                       | >50                                       | 10-30                                     |
| Total                                              | 8                                         | 40                                        |

\* Nutritional factors used based on nutrient density method (g/1000 kcal).

† Nut consumption information was not included in the food frequency questionnaire in this cohort.

**Supplemental Table II.** Spearman correlation coefficients between dietary cholesterol intake, serum total cholesterol, egg consumption and other dietary factors \*

| Food or nutrient              | Dietary cholesterol |                   | Serum total cholesterol |             | Egg           |             |
|-------------------------------|---------------------|-------------------|-------------------------|-------------|---------------|-------------|
|                               | Coefficient         | P value           | Coefficient             | P value     | Coefficient   | P value     |
| Total fat                     | 0.38                | <0.0001           | 0.053                   | <0.0001     | 0.12          | <0.0001     |
| Saturated fat                 | 0.32                | <0.0001           | 0.089                   | <0.0001     | -0.034        | <0.0001     |
| MUFA                          | 0.47                | <0.0001           | 0.036                   | <0.0001     | 0.26          | <0.0001     |
| PUFA                          | -0.20               | <0.0001           | -0.067                  | <0.0001     | 0.013         | 0.04        |
| Fiber                         | -0.17               | <0.0001           | 0.07                    | 0.27        | -0.11         | <0.0001     |
| Animal protein                | 0.47                | <0.0001           | 0.042                   | <0.0001     | 0.34          | <0.0001     |
| Sodium                        | 0.25                | <0.0001           | 0.019                   | <0.0001     | 0.16          | <0.0001     |
| Potatoes                      | 0.053               | <0.0001           | 0.032                   | <0.0001     | 0.019         | 0.0023      |
| Vegetables excluding potatoes | -0.10               | 0.11              | -0.005                  | 0.45        | 0.040         | <0.0001     |
| Egg                           | 0.86                | <0.0001           | <b>-0.009</b>           | <b>0.14</b> | --            |             |
| Red meat                      | 0.15                | <0.0001           | 0.044                   | <0.0001     | 0.038         | <0.0001     |
| Processed meat                | 0.15                | <0.0001           | 0.0055                  | 0.37        | 0.078         | <0.0001     |
| Fish                          | 0.12                | <0.0001           | 0.055                   | <0.0001     | 0.031         | <0.0001     |
| Whole grains                  | -0.16               | <0.0001           | 0.02                    | <0.0001     | -0.12         | <0.0001     |
| Refined grains                | -0.12               | <0.0001           | -0.024                  | <0.0001     | -0.01         | 0.09        |
| aMDS                          | -0.12               | <0.0001           | 0.001                   | 0.86        | -0.012        | 0.048       |
| Serum total cholesterol       | <b>0.040</b>        | <b>&lt;0.0001</b> | --                      |             | <b>-0.009</b> | <b>0.14</b> |

Abbreviations: aMDS = Alternate Mediterranean Diet Score, MUFA = monounsaturated fatty acids, PUFA = polyunsaturated fatty acids

\* Dietary factors are total energy adjusted.

**Supplemental Table III.** Associations between dietary cholesterol intake, serum total cholesterol and egg consumption and overall and cause-specific mortality, adjusting for propensity score in the ATBC Study \*†

| Cause of death | Total event | Dietary cholesterol<br>(per 300 mg) |         | Serum cholesterol<br>(per 1-SD) |         | Egg (per 50 g)    |         |
|----------------|-------------|-------------------------------------|---------|---------------------------------|---------|-------------------|---------|
|                |             | HR (95% CI)                         | P value | HR (95% CI)                     | P value | HR (95% CI)       | P value |
| Overall        | 22,035      | 1.07 (1.04, 1.10)                   | <0.0001 | 1.01 (0.99, 1.03)               | 0.35    | 1.06 (1.03, 1.08) | <0.0001 |
| CVD            | 9,110       | 1.09 (1.04, 1.14)                   | 0.0001  | 1.10 (1.07, 1.13)               | <0.0001 | 1.07 (1.04, 1.11) | <0.0001 |
| Heart disease  | 7,450       | 1.10 (1.05, 1.15)                   | 0.0001  | 1.12 (1.09, 1.16)               | <0.0001 | 1.08 (1.04, 1.12) | <0.0001 |
| Stroke         | 1,621       | 1.05 (0.94, 1.16)                   | 0.40    | 0.99 (0.93, 1.06)               | 0.86    | 1.04 (0.96, 1.13) | 0.29    |
| Cancer         | 7,213       | 1.06 (1.00, 1.11)                   | 0.038   | 0.96 (0.93, 0.99)               | 0.0075  | 1.04 (1.00, 1.08) | 0.071   |

Abbreviations: ATBC = Alpha-Tocopherol, Beta-Carotene Cancer Prevention, CVD = cardiovascular disease, HDL = high-density lipoprotein, HR = hazard ratio, SD = standard deviation

\* HRs of overall and cause-specific mortality are for each increment of 300 mg dietary cholesterol, 1-SD serum total cholesterol, and 50 g egg, respectively.

† We generated propensity scores for each quintile of dietary cholesterol, serum cholesterol and egg consumption using the covariates included in the multivariable adjusted model (for dietary cholesterol and serum total cholesterol: age, body mass index, cigarettes smoked per day, years of smoking, serum total and HDL cholesterol, intervention assignment, systolic and diastolic blood pressure, history of cardiovascular disease, diabetes, education, physical activity, levels of serum alpha-tocopherol, beta-carotene and retinol, and daily dietary total energy, alcohol, and percentage of energy from protein, carbohydrates, saturated fatty acids, monounsaturated fatty acids, and polyunsaturated fatty acids. Mutual adjustment was performed for dietary cholesterol and serum total cholesterol. For egg consumption: same covariates, without dietary cholesterol adjustment). The Cox proportional hazard regression models were adjusted for the generated propensity scores.



**Supplemental Table IV.** Associations between dietary cholesterol intake, serum total cholesterol and egg consumption and overall and cause-specific mortality in the ATBC Study, excluding the initial 2 or 5 years of follow-up \*†

| Cause of death                   | Dietary cholesterol<br>(per 300 mg) |         | Serum cholesterol<br>(1-SD) |         | Egg (per 50 g)    |         |
|----------------------------------|-------------------------------------|---------|-----------------------------|---------|-------------------|---------|
|                                  | HR (95% CI)                         | P value | HR (95% CI)                 | P value | HR (95% CI)       | P value |
| <b>Excluding initial 2 years</b> |                                     |         |                             |         |                   |         |
| Overall                          | 1.10 (1.07, 1.13)                   | <0.0001 | 1.02 (1.00, 1.04)           | 0.030   | 1.06 (1.04, 1.09) | <0.0001 |
| CVD                              | 1.13 (1.08, 1.18)                   | <0.0001 | 1.14 (1.11, 1.17)           | <0.0001 | 1.09 (1.05, 1.13) | <0.0001 |
| Heart disease                    | 1.14 (1.08, 1.20)                   | <0.0001 | 1.16 (1.13, 1.20)           | <0.0001 | 1.09 (1.05, 1.13) | <0.0001 |
| Stroke                           | 1.10 (0.99, 1.22)                   | 0.082   | 1.03 (0.97, 1.11)           | 0.35    | 1.07 (0.99, 1.16) | 0.11    |
| Cancer                           | 1.07 (1.01, 1.12)                   | 0.012   | 0.96 (0.93, 0.99)           | 0.017   | 1.04 (1.00, 1.08) | 0.030   |
| <b>Excluding initial 5 years</b> |                                     |         |                             |         |                   |         |
| Overall                          | 1.10 (1.07, 1.13)                   | <0.0001 | 1.02 (1.00, 1.04)           | 0.051   | 1.06 (1.04, 1.09) | <0.0001 |
| CVD                              | 1.14 (1.09, 1.19)                   | <0.0001 | 1.13 (1.10, 1.16)           | <0.0001 | 1.09 (1.06, 1.13) | <0.0001 |
| Heart disease                    | 1.15 (1.09, 1.21)                   | <0.0001 | 1.15 (1.11, 1.19)           | <0.0001 | 1.10 (1.06, 1.15) | <0.0001 |
| Stroke                           | 1.11 (0.99, 1.23)                   | 0.072   | 1.04 (0.97, 1.11)           | 0.31    | 1.07 (0.98, 1.16) | 0.13    |
| Cancer                           | 1.06 (1.01, 1.12)                   | 0.024   | 0.97 (0.93, 1.00)           | 0.040   | 1.04 (1.00, 1.08) | 0.059   |

Abbreviations: ATBC = Alpha-Tocopherol, Beta-Carotene Cancer Prevention, CVD = cardiovascular disease, HDL = high-density lipoprotein, HR = hazard ratio, SD = standard deviation

\* HRs of overall and cause-specific mortality are for each increment of 300 mg dietary cholesterol, 1-SD serum total cholesterol, and 50 g egg, respectively.

† Models were adjusted for age, body mass index, cigarettes smoked per day, years of smoking, serum total and HDL cholesterol, intervention assignment, systolic and diastolic blood pressure, history of cardiovascular disease, diabetes, education, physical activity, levels of serum alpha-tocopherol, beta-carotene and retinol, and daily dietary total energy, alcohol, and percentage of energy from protein, carbohydrates, saturated fatty acids, monounsaturated fatty acids, and polyunsaturated fatty acids. Mutual adjustment was performed for dietary cholesterol and serum total cholesterol.

**Supplemental Table V.** Associations between dietary cholesterol intake, serum total cholesterol and egg consumption and overall and cause-specific mortality in the ATBC Study, excluding the participants reporting a history of diabetes at baseline \*†

| Cause of death | Dietary cholesterol<br>(per 300 mg) |         | Serum cholesterol<br>(1-SD) |         | Egg (per 50 g)    |         |
|----------------|-------------------------------------|---------|-----------------------------|---------|-------------------|---------|
|                | HR (95% CI)                         | P value | HR (95% CI)                 | P value | HR (95% CI)       | P value |
| Overall        | 1.10 (1.07, 1.14)                   | <0.0001 | 1.02 (1.00, 1.04)           | 0.067   | 1.07 (1.04, 1.09) | <0.0001 |
| CVD            | 1.14 (1.09, 1.19)                   | <0.0001 | 1.14 (1.11, 1.18)           | <0.0001 | 1.09 (1.05, 1.13) | <0.0001 |
| Heart disease  | 1.14 (1.09, 1.20)                   | <0.0001 | 1.17 (1.14, 1.21)           | <0.0001 | 1.09 (1.05, 1.14) | <0.0001 |
| Stroke         | 1.12 (1.01, 1.25)                   | 0.038   | 1.02 (0.95, 1.10)           | 0.51    | 1.08 (0.99, 1.17) | 0.079   |
| Cancer         | 1.07 (1.01, 1.12)                   | 0.013   | 0.96 (0.93, 0.99)           | 0.013   | 1.04 (1.00, 1.08) | 0.044   |

Abbreviations: ATBC = Alpha-Tocopherol, Beta-Carotene Cancer Prevention, CVD = cardiovascular disease, HDL = high-density lipoprotein, HR = hazard ratio, SD = standard deviation

\* HRs of overall and cause-specific mortality are for each increment of 300 mg dietary cholesterol, 1-SD serum total cholesterol, and 50 g egg, respectively.

† Models were adjusted for age, body mass index, cigarettes smoked per day, years of smoking, serum total and HDL cholesterol, intervention assignment, systolic and diastolic blood pressure, history of cardiovascular disease, education, physical activity, levels of serum alpha-tocopherol, beta-carotene and retinol, and daily dietary total energy, alcohol, and percentage of energy from protein, carbohydrates, saturated fatty acids, monounsaturated fatty acids, and polyunsaturated fatty acids. Mutual adjustment was performed for dietary cholesterol and serum total cholesterol.

**Supplemental Table VI.** Associations between dietary cholesterol intake, serum total cholesterol and egg consumption and overall and cause-specific mortality in the ATBC Study (parsimonious models) \*†

| Cause of death | Dietary cholesterol<br>(per 300 mg) |         | Serum cholesterol<br>(1-SD) |         | Egg (per 50 g)    |         |
|----------------|-------------------------------------|---------|-----------------------------|---------|-------------------|---------|
|                | HR (95% CI)                         | P value | HR (95% CI)                 | P value | HR (95% CI)       | P value |
| Overall        | 1.08 (1.05, 1.10)                   | <0.0001 | 1.03 (1.01, 1.04)           | 0.0026  | 1.05 (1.03, 1.07) | <0.0001 |
| CVD            | 1.09 (1.06, 1.13)                   | <0.0001 | 1.14 (1.11, 1.16)           | <0.0001 | 1.06 (1.03, 1.09) | 0.0001  |
| Heart disease  | 1.10 (1.06, 1.14)                   | <0.0001 | 1.16 (1.13, 1.19)           | <0.0001 | 1.06 (1.03, 1.10) | 0.0003  |
| Stroke         | 1.07 (0.99, 1.16)                   | 0.11    | 1.03 (0.96, 1.09)           | 0.46    | 1.05 (0.98, 1.12) | 0.21    |
| Cancer         | 1.07 (1.03, 1.11)                   | 0.0012  | 0.98 (0.95, 1.01)           | 0.19    | 1.03 (0.99, 1.06) | 0.11    |

Abbreviations: ATBC = Alpha-Tocopherol, Beta-Carotene Cancer Prevention, CVD = cardiovascular disease, HDL = high-density lipoprotein, HR = hazard ratio, SD = standard deviation

\* HRs of overall and cause-specific mortality are for each increment of 300 mg dietary cholesterol, 1-SD serum total cholesterol, and 50 g egg, respectively.

† Models were adjusted for age, cigarettes smoked per day, years of smoking, intervention assignment, systolic and diastolic blood pressure, history of cardiovascular disease, education, physical activity, levels of serum alpha-tocopherol, beta-carotene and retinol, and daily dietary total energy and alcohol.

Mutual adjustment was performed for dietary cholesterol and serum total cholesterol.

**Supplemental Table VII.** Associations between dietary cholesterol, serum total cholesterol and egg and overall and cause-specific mortality in the ATBC Study (winsorized models) \*†

| Cause of death | Dietary cholesterol<br>(per 300 mg) |         | Serum cholesterol<br>(1-SD) |         | Egg (per 50 g)    |         |
|----------------|-------------------------------------|---------|-----------------------------|---------|-------------------|---------|
|                | HR (95% CI)                         | P value | HR (95% CI)                 | P value | HR (95% CI)       | P value |
| Overall        | 1.10 (1.07, 1.13)                   | <0.0001 | 1.02 (1.00, 1.04)           | 0.05    | 1.07 (1.04, 1.09) | <0.0001 |
| CVD            | 1.13 (1.08, 1.19)                   | <0.0001 | 1.14 (1.11, 1.18)           | <0.0001 | 1.09 (1.05, 1.13) | <0.0001 |
| Heart disease  | 1.14 (1.08, 1.20)                   | <0.0001 | 1.17 (1.14, 1.21)           | <0.0001 | 1.09 (1.05, 1.14) | <0.0001 |
| Stroke         | 1.12 (1.00, 1.25)                   | 0.051   | 1.04 (0.97, 1.11)           | 0.30    | 1.08 (0.99, 1.17) | 0.092   |
| Cancer         | 1.07 (1.01, 1.12)                   | 0.019   | 0.96 (0.93, 0.99)           | 0.0075  | 1.05 (1.00, 1.09) | 0.033   |

Abbreviations: ATBC = Alpha-Tocopherol, Beta-Carotene Cancer Prevention, CVD = cardiovascular disease, HDL = high-density lipoprotein, HR = hazard ratio, SD = standard deviation

\* The distributions of dietary cholesterol, serum total cholesterol, and egg consumption were winsorized at the 0.5 and 99.5 percentiles. HRs of overall and cause-specific mortality are for each increment of 300 mg dietary cholesterol, 1-SD serum total cholesterol, and 50 g egg, respectively.

† Models were adjusted for age, body mass index, cigarettes smoked per day, years of smoking, serum total and HDL cholesterol, intervention assignment, systolic and diastolic blood pressure, history of cardiovascular disease, diabetes, education, physical activity, levels of serum alpha-tocopherol, beta-carotene and retinol, and daily dietary total energy, alcohol, and percentage of energy from protein, carbohydrates, saturated fatty acids, monounsaturated fatty acids, and polyunsaturated fatty acids. Mutual adjustment was performed for dietary cholesterol and serum total cholesterol.

**Supplemental Table VIII.** Associations between dietary cholesterol intake and overall and CVD mortality in the ATBC Study, based on differing incremental intake \*

| Additional increment of dietary cholesterol intake (mg) | Overall mortality    |         | CVD                  |         |
|---------------------------------------------------------|----------------------|---------|----------------------|---------|
|                                                         | HR (95% CI)          | P value | HR (95% CI)          | P value |
| 50                                                      | 1.015 (1.010, 1.020) | <0.0001 | 1.020 (1.013, 1.028) | <0.0001 |
| 100                                                     | 1.031 (1.021, 1.040) | <0.0001 | 1.041 (1.025, 1.056) | <0.0001 |
| 150                                                     | 1.046 (1.032, 1.061) | <0.0001 | 1.062 (1.038, 1.085) | <0.0001 |
| 200                                                     | 1.062 (1.042, 1.083) | <0.0001 | 1.083 (1.052, 1.115) | <0.0001 |
| 250                                                     | 1.078 (1.053, 1.104) | <0.0001 | 1.105 (1.065, 1.146) | <0.0001 |
| 300                                                     | 1.095 (1.064, 1.126) | <0.0001 | 1.127 (1.078, 1.178) | <0.0001 |
| 350                                                     | 1.111 (1.075, 1.149) | <0.0001 | 1.150 (1.092, 1.210) | <0.0001 |
| 400                                                     | 1.128 (1.086, 1.172) | <0.0001 | 1.173 (1.106, 1.244) | <0.0001 |
| 450                                                     | 1.145 (1.098, 1.195) | <0.0001 | 1.196 (1.120, 1.278) | <0.0001 |
| 500                                                     | 1.163 (1.109, 1.219) | <0.0001 | 1.220 (1.134, 1.313) | <0.0001 |
| 550                                                     | 1.181 (1.120, 1.244) | <0.0001 | 1.245 (1.148, 1.350) | <0.0001 |
| 600                                                     | 1.198 (1.132, 1.269) | <0.0001 | 1.270 (1.163, 1.387) | <0.0001 |

Abbreviations: ATBC = Alpha-Tocopherol, Beta-Carotene Cancer Prevention, CVD = cardiovascular disease, HDL = high-density lipoprotein, HR = hazard ratio, SD = standard deviation

\* Models were adjusted for age, body mass index, cigarettes smoked per day, years of smoking, serum total and HDL cholesterol, intervention assignment, systolic and diastolic blood pressure, history of cardiovascular disease, diabetes, education, physical activity, levels of serum alpha-tocopherol, beta-carotene and retinol, and daily dietary total energy, alcohol, and percentage of energy from protein, carbohydrates, saturated fatty acids, monounsaturated fatty acids, and polyunsaturated fatty acids.

**Supplemental Table IX.** Associations between serum total cholesterol and CVD mortality in the ATBC Study, based on differing concentration increments \*

| Additional increment of serum total cholesterol | CVD mortality        |         |
|-------------------------------------------------|----------------------|---------|
|                                                 | HR (95% CI)          | P value |
| 0.5 mmol/L (or 19.34 mg/dL)                     | 1.057 (1.045, 1.069) | <0.0001 |
| 1 mmol/L (or 38.67 mg/dL)                       | 1.117 (1.092, 1.143) | <0.0001 |
| 1.5 mmol/L (or 58 mg/dL)                        | 1.181 (1.141, 1.222) | <0.0001 |
| 2 mmol/L (or 77.34 mg/dL)                       | 1.248 (1.193, 1.307) | <0.0001 |
| 2.5 mmol/L (or 96.67 mg/dL)                     | 1.320 (1.247, 1.397) | <0.0001 |
| 3 mmol/L (or 116 mg/dL)                         | 1.395 (1.303, 1.493) | <0.0001 |

Abbreviations: ATBC = Alpha-Tocopherol, Beta-Carotene Cancer Prevention, CVD = cardiovascular disease, HDL = high-density lipoprotein, HR = hazard ratio, SD = standard deviation

\* Models were adjusted for age, body mass index, cigarettes smoked per day, years of smoking, serum HDL cholesterol, intervention assignment, systolic and diastolic blood pressure, history of cardiovascular disease, diabetes, education, physical activity, levels of serum alpha-tocopherol, beta-carotene and retinol, and daily dietary total energy, alcohol, cholesterol, and percentage of energy from protein, carbohydrates, saturated fatty acids, monounsaturated fatty acids, and polyunsaturated fatty acids.

**Supplemental Table X.** Associations between egg consumption and overall and CVD mortality in the ATBC Study, based on differing incremental consumption \*

| Additional increment of egg consumption (g) | Overall mortality    |         | CVD                  |         |
|---------------------------------------------|----------------------|---------|----------------------|---------|
|                                             | HR (95% CI)          | P value | HR (95% CI)          | P value |
| 25                                          | 1.030 (1.019, 1.042) | <0.0001 | 1.042 (1.024, 1.059) | <0.0001 |
| 50                                          | 1.062 (1.039, 1.085) | <0.0001 | 1.085 (1.049, 1.122) | <0.0001 |
| 75                                          | 1.094 (1.059, 1.130) | <0.0001 | 1.130 (1.075, 1.188) | <0.0001 |
| 100                                         | 1.127 (1.079, 1.177) | <0.0001 | 1.177 (1.101, 1.258) | <0.0001 |
| 125                                         | 1.161 (1.100, 1.226) | <0.0001 | 1.225 (1.127, 1.332) | <0.0001 |
| 150                                         | 1.197 (1.121, 1.277) | <0.0001 | 1.276 (1.155, 1.411) | <0.0001 |
| 175                                         | 1.233 (1.143, 1.330) | <0.0001 | 1.329 (1.183, 1.494) | <0.0001 |
| 200                                         | 1.270 (1.165, 1.385) | <0.0001 | 1.384 (1.211, 1.582) | <0.0001 |

Abbreviations: ATBC = Alpha-Tocopherol, Beta-Carotene Cancer Prevention, CVD = cardiovascular disease, HDL = high-density lipoprotein, HR = hazard ratio, SD = standard deviation

\* Models were adjusted for age, body mass index, cigarettes smoked per day, years of smoking, serum total and HDL cholesterol, intervention assignment, systolic and diastolic blood pressure, history of cardiovascular disease, diabetes, education, physical activity, levels of serum alpha-tocopherol, beta-carotene and retinol, and daily dietary total energy, alcohol, and percentage of energy from protein, carbohydrates, saturated fatty acids, monounsaturated fatty acids, and polyunsaturated fatty acids.

**Supplemental Table XI.** Associations between quintiles of dietary cholesterol intake, serum total cholesterol and egg consumption and overall and cause-specific mortality in the ATBC Study \*

|                            | <b>Quintile 1</b> | <b>Quintile 2</b>  | <b>Quintile 3</b>  | <b>Quintile 4</b>  | <b>Quintile 5</b>  | <b>P for trend</b> |
|----------------------------|-------------------|--------------------|--------------------|--------------------|--------------------|--------------------|
|                            |                   | <b>HR (95% CI)</b> | <b>HR (95% CI)</b> | <b>HR (95% CI)</b> | <b>HR (95% CI)</b> |                    |
| <b>Dietary cholesterol</b> |                   |                    |                    |                    |                    |                    |
| <b>Cut-points (mg)</b>     | <387              | ≥387 and <489      | ≥489 and <594      | ≥594 and <746      | ≥746               |                    |
| Overall                    | 1.00              | 1.02 (0.98, 1.07)  | 1.04 (0.99, 1.09)  | 1.05 (1.00, 1.11)  | 1.14 (1.06, 1.21)  | 0.0009             |
| CVD                        | 1.00              | 1.02 (0.95, 1.09)  | 1.04 (0.96, 1.12)  | 1.08 (0.99, 1.17)  | 1.18 (1.06, 1.31)  | 0.003              |
| Heart disease              | 1.00              | 1.03 (0.96, 1.11)  | 1.02 (0.94, 1.11)  | 1.08 (0.99, 1.19)  | 1.19 (1.06, 1.33)  | 0.0082             |
| Stroke                     | 1.00              | 0.97 (0.82, 1.14)  | 1.08 (0.91, 1.29)  | 1.04 (0.85, 1.28)  | 1.15 (0.90, 1.48)  | 0.22               |
| Cancer                     | 1.00              | 1.09 (1.00, 1.17)  | 1.08 (0.99, 1.17)  | 1.09 (0.99, 1.20)  | 1.17 (1.04, 1.31)  | 0.04               |
| <b>Serum cholesterol</b>   |                   |                    |                    |                    |                    |                    |
| <b>Cut-points (mmol/L)</b> | <5.28             | ≥5.28 and <5.89    | ≥5.89 and <6.45    | ≥6.45 and <7.15    | ≥7.15              |                    |
| Overall                    | 1.00              | 0.98 (0.94, 1.03)  | 0.95 (0.90, 0.99)  | 0.99 (0.94, 1.04)  | 1.04 (0.99, 1.10)  | 0.18               |
| CVD                        | 1.00              | 1.08 (1.01, 1.16)  | 1.13 (1.06, 1.22)  | 1.19 (1.11, 1.29)  | 1.40 (1.29, 1.52)  | <0.0001            |
| Heart disease              | 1.00              | 1.12 (1.04, 1.21)  | 1.21 (1.12, 1.31)  | 1.26 (1.16, 1.37)  | 1.50 (1.37, 1.64)  | <0.0001            |
| Stroke                     | 1.00              | 0.96 (0.82, 1.12)  | 0.91 (0.77, 1.07)  | 0.97 (0.81, 1.16)  | 1.09 (0.90, 1.33)  | 0.46               |
| Cancer                     | 1.00              | 0.95 (0.88, 1.02)  | 0.86 (0.80, 0.93)  | 0.90 (0.83, 0.97)  | 0.90 (0.82, 0.98)  | 0.0092             |
| <b>Egg</b>                 |                   |                    |                    |                    |                    |                    |
| <b>Cut-points (g)</b>      | <25.1             | ≥25.1 and <37.7    | ≥37.7 and <52.3    | ≥52.3 and <75.4    | ≥75.4              |                    |
| Overall                    | 1.00              | 1.00 (0.96, 1.04)  | 1.03 (0.99, 1.08)  | 1.07 (1.02, 1.12)  | 1.10 (1.04, 1.15)  | <0.0001            |
| CVD                        | 1.00              | 1.03 (0.96, 1.10)  | 1.05 (0.98, 1.12)  | 1.06 (0.98, 1.13)  | 1.15 (1.06, 1.24)  | 0.0013             |
| Heart disease              | 1.00              | 1.02 (0.95, 1.09)  | 1.05 (0.97, 1.13)  | 1.04 (0.96, 1.13)  | 1.14 (1.05, 1.24)  | 0.0055             |
| Stroke                     | 1.00              | 1.08 (0.92, 1.26)  | 1.04 (0.89, 1.23)  | 1.10 (0.93, 1.30)  | 1.16 (0.97, 1.40)  | 0.14               |



|        |      |                   |                   |                   |                   |        |
|--------|------|-------------------|-------------------|-------------------|-------------------|--------|
| Cancer | 1.00 | 1.01 (0.94, 1.09) | 1.09 (1.01, 1.17) | 1.15 (1.06, 1.24) | 1.10 (1.01, 1.21) | 0.0008 |
|--------|------|-------------------|-------------------|-------------------|-------------------|--------|

Abbreviations: ATBC = Alpha-Tocopherol, Beta-Carotene Cancer Prevention, CVD = cardiovascular disease, HDL = high-density lipoprotein, HR = hazard ratio, SD = standard deviation

\* Models were adjusted for age, body mass index, cigarettes smoked per day, years of smoking, serum total and HDL cholesterol, intervention assignment, systolic and diastolic blood pressure, history of cardiovascular disease, diabetes, education, physical activity, levels of serum alpha-tocopherol, beta-carotene and retinol, and daily dietary total energy, alcohol, and percentage of energy from protein, carbohydrates, saturated fatty acids, monounsaturated fatty acids, and polyunsaturated fatty acids. Mutual adjustment was performed for dietary cholesterol and serum total cholesterol.

**Supplemental Table XII.** Associations between quintiles of dietary cholesterol and egg consumption and overall and cause-specific mortality in the ATBC Study (nutrient density models) \*†

|                            | Quintile 1 | Quintile 2        | Quintile 3        | Quintile 4        | Quintile 5        | P for trend |
|----------------------------|------------|-------------------|-------------------|-------------------|-------------------|-------------|
|                            |            | HR (95% CI)       | HR (95% CI)       | HR (95% CI)       | HR (95% CI)       |             |
| <b>Dietary cholesterol</b> |            |                   |                   |                   |                   |             |
| Overall                    | 1.00       | 1.01 (0.97, 1.06) | 1.04 (0.99, 1.09) | 1.07 (1.02, 1.13) | 1.15 (1.09, 1.21) | <0.0001     |
| CVD                        | 1.00       | 1.04 (0.97, 1.11) | 1.05 (0.98, 1.13) | 1.06 (0.98, 1.14) | 1.19 (1.10, 1.29) | 0.0001      |
| Heart disease              | 1.00       | 1.02 (0.95, 1.10) | 1.05 (0.97, 1.14) | 1.06 (0.97, 1.15) | 1.18 (1.08, 1.30) | 0.0004      |
| Stroke                     | 1.00       | 1.11 (0.94, 1.30) | 1.04 (0.88, 1.24) | 1.06 (0.88, 1.26) | 1.22 (1.01, 1.49) | 0.13        |
| Cancer                     | 1.00       | 1.00 (0.93, 1.09) | 1.07 (0.99, 1.16) | 1.12 (1.03, 1.22) | 1.15 (1.05, 1.26) | 0.0002      |
| <b>Egg</b>                 |            |                   |                   |                   |                   |             |
| Overall                    | 1.00       | 1.01 (0.97, 1.05) | 1.02 (0.97, 1.06) | 1.05 (1.00, 1.10) | 1.10 (1.05, 1.15) | <0.0001     |
| CVD                        | 1.00       | 1.06 (1.00, 1.14) | 1.04 (0.97, 1.11) | 1.05 (0.98, 1.13) | 1.18 (1.10, 1.27) | 0.0002      |
| Heart disease              | 1.00       | 1.07 (1.00, 1.15) | 1.03 (0.96, 1.11) | 1.03 (0.95, 1.11) | 1.18 (1.09, 1.27) | 0.0027      |
| Stroke                     | 1.00       | 1.04 (0.88, 1.21) | 1.05 (0.89, 1.23) | 1.14 (0.97, 1.34) | 1.19 (1.00, 1.41) | 0.024       |
| Cancer                     | 1.00       | 0.97 (0.90, 1.04) | 1.05 (0.98, 1.13) | 1.06 (0.99, 1.15) | 1.09 (1.00, 1.18) | 0.0054      |

Abbreviations: ATBC = Alpha-Tocopherol, Beta-Carotene Cancer Prevention, CVD = cardiovascular disease, HDL = high-density lipoprotein, HR = hazard ratio, SD = standard deviation

\* We used the nutrient density model by adjusting daily total energy intake (grams per 1000 kcal), with energy as a continuous covariate in the model.

† Models were adjusted for age, body mass index, cigarettes smoked per day, years of smoking, serum total and HDL cholesterol, intervention assignment, systolic and diastolic blood pressure, history of cardiovascular disease, diabetes, education, physical activity, levels of serum alpha-tocopherol, beta-carotene and retinol, and daily dietary total energy, alcohol, and percentage of energy from protein, carbohydrates, saturated fatty acids, monounsaturated fatty acids, and polyunsaturated fatty acids. Mutual adjustment was performed for dietary cholesterol and serum total cholesterol.

**Supplemental Table XIII.** Associations Between Daily Egg Consumption and Overall and Cause-Specific Mortality in the ATBC Study

| Cause of death           | Egg consumption (per 50 g/day) |         |
|--------------------------|--------------------------------|---------|
|                          | HR (95% CI)                    | P value |
| <b>All causes</b>        |                                |         |
| Model 1: Multivariable * | 1.06 (1.04, 1.09)              | <0.0001 |
| Model 2: Multivariable † | 1.07 (1.05, 1.10)              | <0.0001 |
| <b>CVD</b>               |                                |         |
| Model 1: Multivariable * | 1.09 (1.05, 1.12)              | <0.0001 |
| Model 2: Multivariable † | 1.09 (1.06, 1.13)              | <0.0001 |
| <b>Heart disease</b>     |                                |         |
| Model 1: Multivariable * | 1.09 (1.05, 1.13)              | <0.0001 |
| Model 2: Multivariable † | 1.10 (1.06, 1.15)              | <0.0001 |
| <b>Stroke</b>            |                                |         |
| Model 1: Multivariable * | 1.06 (0.98, 1.15)              | 0.13    |
| Model 2: Multivariable † | 1.06 (0.98, 1.15)              | 0.17    |
| <b>Cancer</b>            |                                |         |
| Model 1: Multivariable * | 1.04 (1.00, 1.08)              | 0.047   |
| Model 2: Multivariable † | 1.05 (1.01, 1.09)              | 0.028   |

Abbreviations: ATBC = Alpha-Tocopherol, Beta-Carotene Cancer Prevention, CVD = cardiovascular disease, HDL = high-density lipoprotein, HR = hazard ratio, SD = standard deviation

\* Models were adjusted for age, body mass index, cigarettes smoked per day, years of smoking, serum total and HDL cholesterol, intervention assignment, systolic and diastolic blood pressure, history of cardiovascular disease, diabetes, education, physical activity, levels of serum alpha-tocopherol, beta-carotene and retinol, and daily dietary total energy, alcohol, and percentage of energy from protein, carbohydrates, saturated fatty acids, monounsaturated fatty acids,

and polyunsaturated fatty acids. Total number of events for all-cause-, CVD-, heart disease-, stroke-, and cancer-death is 22,035, 9,110, 7,450, 1,621 and 7,213, respectively.

† Models were further adjusted for daily dietary intakes of vegetables, fruit, potatoes, legumes, whole grains, red and processed meat and fish (as quintile categories).

**Supplemental Table XIV. Search strategy for systematic review \***

| Pubmed         |                                                                                                                                                                                                                                                                                                                    |            | Embase |                                                                                                                                                                                                                                                                                                                                                                                                                                               |            |
|----------------|--------------------------------------------------------------------------------------------------------------------------------------------------------------------------------------------------------------------------------------------------------------------------------------------------------------------|------------|--------|-----------------------------------------------------------------------------------------------------------------------------------------------------------------------------------------------------------------------------------------------------------------------------------------------------------------------------------------------------------------------------------------------------------------------------------------------|------------|
| No.            | Query                                                                                                                                                                                                                                                                                                              | Result     | No.    | Query                                                                                                                                                                                                                                                                                                                                                                                                                                         | Result     |
| #1             | Case-cohort OR Case-control OR Cohort OR Follow-up OR Longitudinal OR Nested OR Prospective                                                                                                                                                                                                                        | 3,779,661  | #1     | ('prospective study' OR 'cohort study' OR 'case control study' OR 'longitudinal study' OR 'follow up' OR 'case-cohort' OR 'case-control') AND [embase]/lim                                                                                                                                                                                                                                                                                    | 3,011,695  |
| #2             | “Egg” OR “Eggs”                                                                                                                                                                                                                                                                                                    | 138,514    | #2     | ('egg'/exp OR egg OR 'eggs'/exp OR eggs OR egg.ab.) AND [embase]/lim                                                                                                                                                                                                                                                                                                                                                                          | 103,491    |
| #3             | “Cardiovascular Diseases” [Mesh] OR Cardiovascular OR CHD OR Coronary Heart Disease OR Myocardial Infarction OR CVD OR Haemorrhagic Stroke OR Hemorrhagic Stroke OR Heart Failure OR Ischemic Heart Disease OR Ischaemic Heart Disease OR Ischaemic stroke OR Ischemic Stroke OR “Stroke” [Mesh]                   | 3,559,418  | #3     | ('cardiovascular disease'/exp OR cardiovascular.ab. OR 'ischemic heart disease.ab.' OR 'coronary artery disease.ab.' OR 'cerebrovascular accident' OR 'chd.ab.' OR 'cvd.ab.' OR 'coronary heart disease.ab.' OR 'haemorrhagic stroke.ab.' OR 'hemorrhagic stroke.ab.' OR 'heart failure.ab.' OR 'ischaemic heart disease.ab.' OR 'ischaemic stroke.ab.' OR 'ischemic stroke.ab.' OR 'myocardial infarction' OR 'stroke.ab.') AND [embase]/lim | 3,953,810  |
| #4             | human                                                                                                                                                                                                                                                                                                              | 20,377,531 | #4     | 'human' AND [embase]/lim                                                                                                                                                                                                                                                                                                                                                                                                                      | 17,908,143 |
| #5             | #1 AND #2 AND #3 AND #4                                                                                                                                                                                                                                                                                            | 336        | #5     | (#1 AND #2 AND #3 AND #4)                                                                                                                                                                                                                                                                                                                                                                                                                     | 529        |
| Web of Science |                                                                                                                                                                                                                                                                                                                    |            |        |                                                                                                                                                                                                                                                                                                                                                                                                                                               |            |
| No.            | Query                                                                                                                                                                                                                                                                                                              | Result     |        |                                                                                                                                                                                                                                                                                                                                                                                                                                               |            |
| #1             | (TS=((Case-cohort or Case-control or Cohort or Follow-up or Longitudinal or Nested or Prospective) AND (Egg) AND (Cardiovascular or CHD or Coronary Heart Disease or CVD or Heart Failure or Ischaemic Heart Disease or Ischemic Heart Disease or Myocardial Infarction or Stroke))) AND DOCUMENT TYPES: (Article) | 441        |        |                                                                                                                                                                                                                                                                                                                                                                                                                                               |            |

\* Search date: 2021-08-05.

**Supplemental Table XV. Study characteristics in the meta-analysis**

| First author, year of publication | Cohort                                           | Country       | Years of follow-up | Number of participants | Range of age | FFQ Assessment                                                       | Ascertainment of Cases                                                                                                                                                                                         | Number of endpoints | Exposure categories | Relative Risks (95% CI) * | Covariates in the multivariable-adjusted model                                                                                                                                                                                                                                                                                                                                                                                                                                                                                         |
|-----------------------------------|--------------------------------------------------|---------------|--------------------|------------------------|--------------|----------------------------------------------------------------------|----------------------------------------------------------------------------------------------------------------------------------------------------------------------------------------------------------------|---------------------|---------------------|---------------------------|----------------------------------------------------------------------------------------------------------------------------------------------------------------------------------------------------------------------------------------------------------------------------------------------------------------------------------------------------------------------------------------------------------------------------------------------------------------------------------------------------------------------------------------|
| Abdollahi et al. 2019             | Kuopio Ischaemic Heart Disease Risk Factor Study | Finland       | 21.2               | 1,950 men              | 42-60 y      | Guided 4-day food records, baseline                                  | Computer linkage to the national hospital discharge and death certificate registers                                                                                                                            | Stroke (217)        | <15 g/d             | 1.00 (reference)          | Age, examination year, energy intake, smoking, BMI, leisure-time physical activity, use of hypertension medication, intakes of alcohol, fruits, berries, and vegetables.                                                                                                                                                                                                                                                                                                                                                               |
|                                   |                                                  |               |                    |                        |              |                                                                      |                                                                                                                                                                                                                |                     | 15-26 g/d           | 1.01 (0.69,1.47)          |                                                                                                                                                                                                                                                                                                                                                                                                                                                                                                                                        |
|                                   |                                                  |               |                    |                        |              |                                                                      |                                                                                                                                                                                                                |                     | 27-45 g/d           | 1.10 (0.76,1.61)          |                                                                                                                                                                                                                                                                                                                                                                                                                                                                                                                                        |
|                                   |                                                  |               |                    |                        |              |                                                                      |                                                                                                                                                                                                                |                     | >45 g/d             | 0.81 (0.54,1.23)          |                                                                                                                                                                                                                                                                                                                                                                                                                                                                                                                                        |
| Chen et al. 2021                  | WHI                                              | United States | 17.8               | 161,808 women          | 50-79 y      | Self-administered FFQ, baseline and 24-h dietary recalls for 4 times | Questionnaires were used to collect information on clinical outcomes. Deaths were ascertained by reviewing death certificates, medical records, or autopsy reports, or by linkage to the National Death Index. | CVD (9,808)         | <1/w                | 1.00 (reference)          | Age, region, race/ethnicity, study group, education, annual family income, health insurance, smoking status, pack-years of smoking, alcohol consumption, quitting smoking/drinking owing to health problems, recreational physical activity, total energy intake, using fat to deep fry/pan fry/sauté, aspirin use, use of nonsteroidal anti-inflammatory drugs, hormone use, self-rated health status, waist circumference, diabetes, systolic and diastolic blood pressure, antihypertensive drug use, dyslipidemia and food groups. |
|                                   |                                                  |               |                    |                        |              |                                                                      |                                                                                                                                                                                                                |                     | 1-2/w               | 0.97(0.92, 1.03)          |                                                                                                                                                                                                                                                                                                                                                                                                                                                                                                                                        |
|                                   |                                                  |               |                    |                        |              |                                                                      |                                                                                                                                                                                                                |                     | 2-3/w               | 1.00(0.94, 1.07)          |                                                                                                                                                                                                                                                                                                                                                                                                                                                                                                                                        |
|                                   |                                                  |               |                    |                        |              |                                                                      |                                                                                                                                                                                                                |                     | 3-7/w               | 1.05(0.99, 1.12)          |                                                                                                                                                                                                                                                                                                                                                                                                                                                                                                                                        |
|                                   |                                                  |               |                    |                        |              |                                                                      |                                                                                                                                                                                                                |                     | >7/w                | 1.14(1.04, 1.25)          |                                                                                                                                                                                                                                                                                                                                                                                                                                                                                                                                        |
|                                   |                                                  |               |                    |                        |              |                                                                      |                                                                                                                                                                                                                |                     | 0.5/d               | 1.06(1.03, 1.10)          |                                                                                                                                                                                                                                                                                                                                                                                                                                                                                                                                        |
|                                   |                                                  |               |                    |                        |              |                                                                      |                                                                                                                                                                                                                | CVD death (5,589)   | <1/w                | 1.00 (reference)          |                                                                                                                                                                                                                                                                                                                                                                                                                                                                                                                                        |
|                                   |                                                  |               |                    |                        |              |                                                                      |                                                                                                                                                                                                                |                     | 1-2/w               | 1.03(0.96, 1.11)          |                                                                                                                                                                                                                                                                                                                                                                                                                                                                                                                                        |
|                                   |                                                  |               |                    |                        |              |                                                                      |                                                                                                                                                                                                                |                     | 2-3/w               | 1.03(0.95, 1.12)          |                                                                                                                                                                                                                                                                                                                                                                                                                                                                                                                                        |
|                                   |                                                  |               |                    |                        |              |                                                                      |                                                                                                                                                                                                                |                     | 3-7/w               | 1.11(1.02, 1.20)          |                                                                                                                                                                                                                                                                                                                                                                                                                                                                                                                                        |
|                                   |                                                  |               |                    |                        |              |                                                                      |                                                                                                                                                                                                                |                     | >7/w                | 1.23(1.10, 1.39)          |                                                                                                                                                                                                                                                                                                                                                                                                                                                                                                                                        |
|                                   |                                                  |               |                    |                        |              |                                                                      |                                                                                                                                                                                                                | IHD (7,091)         | 0.5/d               | 1.10(1.05, 1.15)          |                                                                                                                                                                                                                                                                                                                                                                                                                                                                                                                                        |
|                                   |                                                  |               |                    |                        |              |                                                                      |                                                                                                                                                                                                                |                     | <1/w                | 1.00 (reference)          |                                                                                                                                                                                                                                                                                                                                                                                                                                                                                                                                        |
|                                   |                                                  |               |                    |                        |              |                                                                      |                                                                                                                                                                                                                |                     | 1-2/w               | 1.01(0.93, 1.10)          |                                                                                                                                                                                                                                                                                                                                                                                                                                                                                                                                        |
| 2-3/w                             | 1.01(0.93, 1.10)                                 |               |                    |                        |              |                                                                      |                                                                                                                                                                                                                |                     |                     |                           |                                                                                                                                                                                                                                                                                                                                                                                                                                                                                                                                        |
| 3-7/w                             | 1.10(1.01, 1.21)                                 |               |                    |                        |              |                                                                      |                                                                                                                                                                                                                |                     |                     |                           |                                                                                                                                                                                                                                                                                                                                                                                                                                                                                                                                        |
| >7/w                              | 1.11(1.01, 1.23)                                 |               |                    |                        |              |                                                                      |                                                                                                                                                                                                                |                     |                     |                           |                                                                                                                                                                                                                                                                                                                                                                                                                                                                                                                                        |
| 0.5/d                             | 1.09(1.03, 1.16)                                 |               |                    |                        |              |                                                                      |                                                                                                                                                                                                                |                     |                     |                           |                                                                                                                                                                                                                                                                                                                                                                                                                                                                                                                                        |

|                     |                    |                                      |     |                      |       |                                                                                  |                                                             |                          |                   |                  |                                                                                                                                                                                                                                                         |
|---------------------|--------------------|--------------------------------------|-----|----------------------|-------|----------------------------------------------------------------------------------|-------------------------------------------------------------|--------------------------|-------------------|------------------|---------------------------------------------------------------------------------------------------------------------------------------------------------------------------------------------------------------------------------------------------------|
|                     |                    |                                      |     |                      |       |                                                                                  |                                                             | Ischemic stroke (2,430)  | <1/w              | 1.00 (reference) |                                                                                                                                                                                                                                                         |
|                     |                    |                                      |     |                      |       |                                                                                  |                                                             |                          | 1-2/w             | 1.10(0.96, 1.26) |                                                                                                                                                                                                                                                         |
|                     |                    |                                      |     |                      |       |                                                                                  |                                                             |                          | 2-3/w             | 1.26(1.09, 1.46) |                                                                                                                                                                                                                                                         |
|                     |                    |                                      |     |                      |       |                                                                                  |                                                             |                          | 3-7/w             | 1.13(0.97, 1.33) |                                                                                                                                                                                                                                                         |
|                     |                    |                                      |     |                      |       |                                                                                  |                                                             |                          | >7/w              | 1.34(1.14, 1.59) |                                                                                                                                                                                                                                                         |
|                     |                    |                                      |     |                      |       |                                                                                  |                                                             |                          | 0.5/d             | 1.18(1.07, 1.30) |                                                                                                                                                                                                                                                         |
|                     |                    |                                      |     |                      |       |                                                                                  |                                                             | Hemorrhagic stroke (535) | <1/w              | 1.00 (reference) |                                                                                                                                                                                                                                                         |
|                     |                    |                                      |     |                      |       |                                                                                  |                                                             |                          | 1-2/w             | 0.94(0.71, 1.24) |                                                                                                                                                                                                                                                         |
|                     |                    |                                      |     |                      |       |                                                                                  |                                                             |                          | 2-3/w             | 0.83(0.61, 1.12) |                                                                                                                                                                                                                                                         |
|                     |                    |                                      |     |                      |       |                                                                                  |                                                             |                          | 3-7/w             | 0.81(0.59, 1.13) |                                                                                                                                                                                                                                                         |
|                     |                    |                                      |     |                      |       |                                                                                  |                                                             |                          | >7/w              | 0.69(0.49, 0.99) |                                                                                                                                                                                                                                                         |
|                     |                    |                                      |     |                      |       |                                                                                  |                                                             |                          | 0.5/d             | 0.83(0.66, 1.04) |                                                                                                                                                                                                                                                         |
| Dehghan et al. 2020 | ONTARGET/TRANSCEND | 40 middle- and high-income countries | 4.7 | 31,410 men and women | ≥55 y | FFQ, baseline, 6 wk, 6 mo, every 6 mo after randomization until study completion | Using standardised criteria, by a blinded central committee | CVD (5,181)              | 0.2 (0-0.6)/wk    | 1.00 (reference) | Age; sex; smoking; location; BMI; education; physical activity; history of diabetes; history of myocardial infarction; history of stroke; medication; trial allocation; daily intakes of fruit, vegetables, red meat, poultry, fish, dairy and regions. |
|                     |                    |                                      |     |                      |       |                                                                                  |                                                             |                          | 1.8 (1.3-2.3)/wk  | 1.06(0.99, 1.21) |                                                                                                                                                                                                                                                         |
|                     |                    |                                      |     |                      |       |                                                                                  |                                                             |                          | 3.7 (3.3-4.2)/wk  | 1.04(0.90, 1.21) |                                                                                                                                                                                                                                                         |
|                     |                    |                                      |     |                      |       |                                                                                  |                                                             |                          | 6.3 (5.7-6.9)/wk  | 1.11(0.98, 1.25) |                                                                                                                                                                                                                                                         |
|                     |                    |                                      |     |                      |       |                                                                                  |                                                             |                          | 8.6 (7.6-12.5)/wk | 0.97(0.73, 1.29) |                                                                                                                                                                                                                                                         |
|                     |                    |                                      |     |                      |       |                                                                                  |                                                             | CVD death (2,264)        | 0.2 (0-0.6)/wk    | 1.00 (reference) |                                                                                                                                                                                                                                                         |
|                     |                    |                                      |     |                      |       |                                                                                  |                                                             |                          | 1.8 (1.3-2.3)/wk  | 1.04(0.94, 1.14) |                                                                                                                                                                                                                                                         |
|                     |                    |                                      |     |                      |       |                                                                                  |                                                             |                          | 3.7 (3.3-4.2)/wk  | 1.07(0.86, 1.34) |                                                                                                                                                                                                                                                         |
|                     |                    |                                      |     |                      |       |                                                                                  |                                                             |                          | 6.3 (5.7-6.9)/wk  | 1.02(0.85, 1.23) |                                                                                                                                                                                                                                                         |
|                     |                    |                                      |     |                      |       |                                                                                  |                                                             |                          | 8.6 (7.6-12.5)/wk | 0.87(0.56, 1.37) |                                                                                                                                                                                                                                                         |
|                     |                    |                                      |     |                      |       |                                                                                  |                                                             | MI (1,554)               | 0.2 (0-0.6)/wk    | 1.00 (reference) |                                                                                                                                                                                                                                                         |
|                     |                    |                                      |     |                      |       |                                                                                  |                                                             |                          | 1.8 (1.3-2.3)/wk  | 1.00(0.89, 1.11) |                                                                                                                                                                                                                                                         |
|                     |                    |                                      |     |                      |       |                                                                                  |                                                             |                          | 3.7 (3.3-4.2)/wk  | 0.91(0.69, 1.21) |                                                                                                                                                                                                                                                         |

|      |              |     |                       |       |                    |                                                                                                                                                               |                   |                  |                  |                                                                                                                                                                                                                             |
|------|--------------|-----|-----------------------|-------|--------------------|---------------------------------------------------------------------------------------------------------------------------------------------------------------|-------------------|------------------|------------------|-----------------------------------------------------------------------------------------------------------------------------------------------------------------------------------------------------------------------------|
|      |              |     |                       |       |                    |                                                                                                                                                               | 6.3 (5.7-6.9)/wk  | 1.07(0.86, 1.35) |                  |                                                                                                                                                                                                                             |
|      |              |     |                       |       |                    |                                                                                                                                                               | 8.6 (7.6-12.5)/wk | 1.12(0.68, 1.82) |                  |                                                                                                                                                                                                                             |
|      |              |     |                       |       |                    | Stroke (1,394)                                                                                                                                                | 0.2 (0-0.6)/wk    | 1.00 (reference) |                  |                                                                                                                                                                                                                             |
|      |              |     |                       |       |                    |                                                                                                                                                               | 1.8 (1.3-2.3)/wk  | 1.10(0.97, 1.24) |                  |                                                                                                                                                                                                                             |
|      |              |     |                       |       |                    |                                                                                                                                                               | 3.7 (3.3-4.2)/wk  | 1.12(0.85, 1.47) |                  |                                                                                                                                                                                                                             |
|      |              |     |                       |       |                    |                                                                                                                                                               | 6.3 (5.7-6.9)/wk  | 1.17(0.95, 1.45) |                  |                                                                                                                                                                                                                             |
|      |              |     |                       |       |                    |                                                                                                                                                               | 8.6 (7.6-12.5)/wk | 0.97(0.58, 1.64) |                  |                                                                                                                                                                                                                             |
|      |              |     |                       |       |                    | HF (1,337)                                                                                                                                                    | 0.2 (0-0.6)/wk    | 1.00 (reference) |                  |                                                                                                                                                                                                                             |
|      |              |     |                       |       |                    |                                                                                                                                                               | 1.8 (1.3-2.3)/wk  | 1.14(1.00, 1.29) |                  |                                                                                                                                                                                                                             |
|      |              |     |                       |       |                    |                                                                                                                                                               | 3.7 (3.3-4.2)/wk  | 1.09(0.81, 1.47) |                  |                                                                                                                                                                                                                             |
|      |              |     |                       |       |                    |                                                                                                                                                               | 6.3 (5.7-6.9)/wk  | 1.33(1.05, 1.68) |                  |                                                                                                                                                                                                                             |
|      |              |     |                       |       |                    |                                                                                                                                                               | 8.6 (7.6-12.5)/wk | 1.25(0.74, 2.11) |                  |                                                                                                                                                                                                                             |
| PURE | 21 countries | 9.5 | 114,615 men and women | >50 y | FFQ, baseline only | Death certificates (available in 100% of deaths), medical records (MI: 49.4%, stroke 80.8% and heart failure: 76.2%), household interviews and other sources. | CVD (8,477)       | 0.2 (0-0.6)/wk   | 1.00 (reference) | Age; sex; smoking; location; education; physical activity; history of diabetes; daily intakes of fruits, vegetables, dairy, red meat, poultry and fish; percentage energy from carbohydrate; total daily energy and center. |
|      |              |     |                       |       |                    |                                                                                                                                                               | 1.8 (1.3-2.3)/wk  | 0.92(0.85, 0.99) |                  |                                                                                                                                                                                                                             |
|      |              |     |                       |       |                    |                                                                                                                                                               | 3.7 (3.3-4.2)/wk  | 0.88(0.80, 0.96) |                  |                                                                                                                                                                                                                             |
|      |              |     |                       |       |                    |                                                                                                                                                               | 6.3 (5.7-6.9)/wk  | 0.94(0.84, 1.04) |                  |                                                                                                                                                                                                                             |
|      |              |     |                       |       |                    |                                                                                                                                                               | 8.6 (7.6-12.5)/wk | 0.92(0.83, 1.01) |                  |                                                                                                                                                                                                                             |
|      |              |     |                       |       |                    | CVD death (3,410)                                                                                                                                             | 0.2 (0-0.6)/wk    | 1.00 (reference) |                  |                                                                                                                                                                                                                             |
|      |              |     |                       |       |                    |                                                                                                                                                               | 1.8 (1.3-2.3)/wk  | 0.95(0.84, 1.08) |                  |                                                                                                                                                                                                                             |
|      |              |     |                       |       |                    |                                                                                                                                                               | 3.7 (3.3-4.2)/wk  | 0.91(0.78, 1.06) |                  |                                                                                                                                                                                                                             |
|      |              |     |                       |       |                    |                                                                                                                                                               | 6.3 (5.7-6.9)/wk  | 0.92(0.77, 1.10) |                  |                                                                                                                                                                                                                             |
|      |              |     |                       |       |                    |                                                                                                                                                               | 8.6 (7.6-12.5)/wk | 1.00(0.85, 1.19) |                  |                                                                                                                                                                                                                             |
|      |              |     |                       |       |                    | MI (3,664)                                                                                                                                                    | 0.2 (0-0.6)/wk    | 1.00 (reference) |                  |                                                                                                                                                                                                                             |
|      |              |     |                       |       |                    |                                                                                                                                                               | 1.8 (1.3-2.3)/wk  | 0.83(0.74, 0.93) |                  |                                                                                                                                                                                                                             |
|      |              |     |                       |       |                    |                                                                                                                                                               | 3.7 (3.3-4.2)/wk  | 0.78(0.68, 0.89) |                  |                                                                                                                                                                                                                             |



|                         |                                |               |     |                     |         |                                                                                                       |                                                                                                                                                                                                           |                |                   |                   |                                                                                                                                                                                                                                                                               |
|-------------------------|--------------------------------|---------------|-----|---------------------|---------|-------------------------------------------------------------------------------------------------------|-----------------------------------------------------------------------------------------------------------------------------------------------------------------------------------------------------------|----------------|-------------------|-------------------|-------------------------------------------------------------------------------------------------------------------------------------------------------------------------------------------------------------------------------------------------------------------------------|
|                         |                                |               |     |                     |         |                                                                                                       |                                                                                                                                                                                                           |                | 6.3 (5.7-6.9)/wk  | 0.79(0.67, 0.93)  |                                                                                                                                                                                                                                                                               |
|                         |                                |               |     |                     |         |                                                                                                       |                                                                                                                                                                                                           |                | 8.6 (7.6-12.5)/wk | 0.84(0.72, 0.98)  |                                                                                                                                                                                                                                                                               |
|                         |                                |               |     |                     |         |                                                                                                       |                                                                                                                                                                                                           | Stroke (3,916) | 0.2 (0-0.6)/wk    | 1.00 (reference)  |                                                                                                                                                                                                                                                                               |
|                         |                                |               |     |                     |         |                                                                                                       |                                                                                                                                                                                                           |                | 1.8 (1.3-2.3)/wk  | 1.03(0.9, 1.16)   |                                                                                                                                                                                                                                                                               |
|                         |                                |               |     |                     |         |                                                                                                       |                                                                                                                                                                                                           |                | 3.7 (3.3-4.2)/wk  | 0.97(0.85, 1.12)  |                                                                                                                                                                                                                                                                               |
|                         |                                |               |     |                     |         |                                                                                                       |                                                                                                                                                                                                           |                | 6.3 (5.7-6.9)/wk  | 1.05(0.90, 1.21)  |                                                                                                                                                                                                                                                                               |
|                         |                                |               |     |                     |         |                                                                                                       |                                                                                                                                                                                                           |                | 8.6 (7.6-12.5)/wk | 0.97(0.84, 1.13)  |                                                                                                                                                                                                                                                                               |
|                         |                                |               |     |                     |         |                                                                                                       |                                                                                                                                                                                                           | HF (939)       | 0.2 (0-0.6)/wk    | 1.00 (reference)  |                                                                                                                                                                                                                                                                               |
|                         |                                |               |     |                     |         |                                                                                                       |                                                                                                                                                                                                           |                | 1.8 (1.3-2.3)/wk  | 1.08(0.83, 1.39)  |                                                                                                                                                                                                                                                                               |
|                         |                                |               |     |                     |         |                                                                                                       |                                                                                                                                                                                                           |                | 3.7 (3.3-4.2)/wk  | 1.10(0.82, 1.46)  |                                                                                                                                                                                                                                                                               |
|                         |                                |               |     |                     |         |                                                                                                       |                                                                                                                                                                                                           |                | 6.3 (5.7-6.9)/wk  | 1.14(0.81, 1.61)  |                                                                                                                                                                                                                                                                               |
|                         |                                |               |     |                     |         |                                                                                                       |                                                                                                                                                                                                           |                | 8.6 (7.6-12.5)/wk | 1.24(0.90, 1.70)  |                                                                                                                                                                                                                                                                               |
| Diez-Espino et al. 2017 | PREDIMED study                 | Spain         | 5.8 | 7,216 men and women | 55-80 y | Interviewer-administered FFQ, every year (cumulative average), but HR calculated from baseline intake | Repeated contacts with participants, general practitioners who were responsible for the clinical care of the participants, yearly review of medical records, and consultation of the National Death Index | CVD† (342)     | <2/wk             | 1.00 (reference)  | Age, sex, BMI and intervention group, recruitment center, smoking status, physical activity during leisure time, educational status, diabetes, hypertension, hypercholesterolemia, family history of CVD, Mediterranean food pattern, alcohol intake and total energy intake. |
|                         |                                |               |     |                     |         |                                                                                                       |                                                                                                                                                                                                           |                | 2-4/wk            | 0.95 (0.75, 1.19) |                                                                                                                                                                                                                                                                               |
|                         |                                |               |     |                     |         |                                                                                                       |                                                                                                                                                                                                           |                | >4/wk             | 1.22 (0.72, 2.07) |                                                                                                                                                                                                                                                                               |
| Djousse et al. 2008     | PHS (Physicians' Health Study) | United States | 20  | 21,275 men          | 40-85 y | SFFQ, baseline, 24, 48, 72, 96, and 120 months after randomization                                    | Questionnaire were used to gather the information of the occurrence of new medical diagnoses including HF and confirmed by physicians or medical records                                                  | HF (1,337)     | <1/wk             | 1.00 (reference)  | Age, body mass index, smoking, alcohol consumption, history of diabetes mellitus, atrial fibrillation, hypertension, physical activity, history of valvular heart disease and treatment for cholesterol.                                                                      |
|                         |                                |               |     |                     |         |                                                                                                       |                                                                                                                                                                                                           |                | 1/wk              | 0.93(0.78, 1.12)  |                                                                                                                                                                                                                                                                               |
|                         |                                |               |     |                     |         |                                                                                                       |                                                                                                                                                                                                           |                | 2-4/wk            | 1.03(0.86, 1.22)  |                                                                                                                                                                                                                                                                               |
|                         |                                |               |     |                     |         |                                                                                                       |                                                                                                                                                                                                           |                | 5-6/wk            | 1.01(0.78, 1.32)  |                                                                                                                                                                                                                                                                               |
|                         |                                |               |     |                     |         |                                                                                                       |                                                                                                                                                                                                           |                | 1/d               | 1.28(1.02, 1.61)  |                                                                                                                                                                                                                                                                               |
|                         |                                |               |     |                     |         |                                                                                                       |                                                                                                                                                                                                           |                | ≥2/d              | 1.64(1.08, 2.49)  |                                                                                                                                                                                                                                                                               |

|                             |                                      |               |                                                                    |                       |             |                                                                    |                                                                                                                                                                                                                                                  |                |                                                                            |                                                                                                                                          |                                                                                                                                                                                                                                |
|-----------------------------|--------------------------------------|---------------|--------------------------------------------------------------------|-----------------------|-------------|--------------------------------------------------------------------|--------------------------------------------------------------------------------------------------------------------------------------------------------------------------------------------------------------------------------------------------|----------------|----------------------------------------------------------------------------|------------------------------------------------------------------------------------------------------------------------------------------|--------------------------------------------------------------------------------------------------------------------------------------------------------------------------------------------------------------------------------|
| Djousse et al. 2008         | PHS (Physicians' Health Study)       | United States | 20                                                                 | 21,327 men            | 40-86 y     | SFFQ, baseline, 24, 48, 72, 96, and 120 months after randomization | Questionnaire were used to gather the information of the occurrence of new medical diagnoses including MI, stroke and confirmed by physicians or medical records, death certificates were obtained for confirmation and review of cause of death | MI (1,550)     | <1/wk<br>1/wk<br>2-4/wk<br>5-6/wk<br>>7/wk                                 | 1.00 (reference)<br>1.12 (0.96, 1.31)<br>1.16 (1.00, 1.36)<br>1.18 (0.93, 1.49)<br>0.90 (0.72, 1.14)                                     | Age, BMI, smoking, history of hypertension, vitamin intake, alcohol, physical activity, breakfast cereal, vegetables, treatment arm, atrial fibrillation, diabetes, hypercholesterolemia, and premature myocardial infarction. |
|                             |                                      |               |                                                                    |                       |             |                                                                    |                                                                                                                                                                                                                                                  | Stroke (1,342) | <1/wk<br>1/wk<br>2-4/wk<br>5-6/wk<br>>7/wk                                 | 1.00 (reference)<br>0.96 (0.82, 1.13)<br>1.06 (0.91, 1.24)<br>1.13 (0.89, 1.42)<br>0.99 (0.80, 1.23)                                     |                                                                                                                                                                                                                                |
| Djousse et al. 2020         | MVP                                  | United States | 3.24                                                               | 188,267 men and women | 64.4 y      | SFFQ, baseline                                                     | Veterans Health Administration (VHA) electronic medical records system                                                                                                                                                                           | MI (10,260)    | <1/month<br>1-3/month<br>1/week<br>2-4/week<br>5-6/week<br>1/day<br>>2/day | 1.00 (reference)<br>0.93(0.85, 1.02)<br>0.96(0.87, 1.05)<br>0.98(0.89, 1.07)<br>1.08(0.98, 1.19)<br>1.11(1.00, 1.24)<br>1.13(1.00, 1.28) | Age, sex, race, education, body mass index, exercise, smoking, alcohol intake, and DASH score.                                                                                                                                 |
| Djousse et al. 2021         | ARIC, CHS, JHS, MESA, PHS, WACS, WHS | United States | ARIC: 20.8; CHS:NA; JHS: 7; MESA: 13.2, PHS: 9, WACS: 9.4, WHS: NA | 89,687 men and women  | 24.9-73.0 y | FFQ or diet history, baseline                                      | Medical records, adjudicated by cohort-specific endpoint committees                                                                                                                                                                              | CHD (5,867)    | <1/month<br>1-3/month<br>1/week<br>2-4/week<br>5-6/week<br>≥7/w            | 1.00 (reference)<br>1.00(0.92, 1.08)<br>0.93(0.85, 1.02)<br>0.97(0.89, 1.05)<br>0.94(0.82, 1.06)<br>1.06(0.92, 1.9)                      | Age, sex, body mass index, smoking, alcohol intake, exercise, and components of DASH score.                                                                                                                                    |
| Drouin-Chartier et al. 2020 | NHS                                  | United States | 32                                                                 | 83,349 women          | 30-55 y     | Self-administered SFFQ, every 4 years                              | Self-report with or without validation with medical records                                                                                                                                                                                      | CVD (7,411)    | <1/mo<br>1-<4/mo                                                           | 1.00 (reference)<br>1.01 (0.89, 1.14)                                                                                                    | Age, calendar time, smoking status, BMI, physical activity, postmenopausal                                                                                                                                                     |

|        |               |    |              |         |                                       |                                                             |                |             |                   |                                                                                                                                                                                                                                                                                                                                                       |
|--------|---------------|----|--------------|---------|---------------------------------------|-------------------------------------------------------------|----------------|-------------|-------------------|-------------------------------------------------------------------------------------------------------------------------------------------------------------------------------------------------------------------------------------------------------------------------------------------------------------------------------------------------------|
|        |               |    |              |         |                                       |                                                             |                | 1-<3/wk     | 0.96 (0.84, 1.08) | hormone use, race, family history of myocardial infarction, baseline high blood cholesterol, baseline high blood pressure, alcohol intake, multivitamin use, daily intake of total calories, full-fat milk, bacon, red meat, other processed meats, refined grains, fruits, vegetables, potatoes, coffee, fruit juices, and sugar-sweetened beverages |
|        |               |    |              |         |                                       |                                                             |                | 3-<5/wk     | 0.91 (0.79, 1.03) |                                                                                                                                                                                                                                                                                                                                                       |
|        |               |    |              |         |                                       |                                                             |                | 5-<7/wk     | 0.90 (0.75, 1.07) |                                                                                                                                                                                                                                                                                                                                                       |
|        |               |    |              |         |                                       |                                                             |                | >1/d        | 0.93 (0.77, 1.14) |                                                                                                                                                                                                                                                                                                                                                       |
|        |               |    |              |         |                                       |                                                             |                | Per 1 egg/d | 0.94 (0.85, 1.04) |                                                                                                                                                                                                                                                                                                                                                       |
|        |               |    |              |         |                                       |                                                             | CHD (3,896)    | <1/mo       | 1.00 (reference)  |                                                                                                                                                                                                                                                                                                                                                       |
|        |               |    |              |         |                                       |                                                             |                | 1-<4/mo     | 0.94 (0.79, 1.12) |                                                                                                                                                                                                                                                                                                                                                       |
|        |               |    |              |         |                                       |                                                             |                | 1-<3/wk     | 0.89 (0.76, 1.05) |                                                                                                                                                                                                                                                                                                                                                       |
|        |               |    |              |         |                                       |                                                             |                | 3-<5/wk     | 0.85 (0.71, 1.01) |                                                                                                                                                                                                                                                                                                                                                       |
|        |               |    |              |         |                                       |                                                             |                | 5-<7/wk     | 0.88 (0.69, 1.11) |                                                                                                                                                                                                                                                                                                                                                       |
|        |               |    |              |         |                                       |                                                             |                | >1/d        | 0.85 (0.65, 1.11) |                                                                                                                                                                                                                                                                                                                                                       |
|        |               |    |              |         |                                       |                                                             |                | Per 1 egg/d | 0.92 (0.80, 1.05) |                                                                                                                                                                                                                                                                                                                                                       |
|        |               |    |              |         |                                       |                                                             | Stroke (3,587) | <1/mo       | 1.00 (reference)  |                                                                                                                                                                                                                                                                                                                                                       |
|        |               |    |              |         |                                       |                                                             |                | 1-<4/mo     | 1.09 (0.90, 1.31) |                                                                                                                                                                                                                                                                                                                                                       |
|        |               |    |              |         |                                       |                                                             |                | 1-<3/wk     | 1.03 (0.86, 1.24) |                                                                                                                                                                                                                                                                                                                                                       |
|        |               |    |              |         |                                       |                                                             |                | 3-<5/wk     | 0.97 (0.79, 1.17) |                                                                                                                                                                                                                                                                                                                                                       |
|        |               |    |              |         |                                       |                                                             |                | 5-<7/wk     | 0.91 (0.69, 1.20) |                                                                                                                                                                                                                                                                                                                                                       |
|        |               |    |              |         |                                       |                                                             |                | >1/d        | 1.04 (0.77, 1.40) |                                                                                                                                                                                                                                                                                                                                                       |
|        |               |    |              |         |                                       |                                                             |                | Per 1 egg/d | 0.96 (0.83, 1.12) |                                                                                                                                                                                                                                                                                                                                                       |
| NHS II | United States | 22 | 90,214 women | 25-44 y | Self-administered SFFQ, every 4 years | Self-report with or without validation with medical records | CVD (1,225)    | <1/mo       | 1.00 (reference)  | Age, calendar time, smoking status, BMI, physical activity, postmenopausal hormone use, race, family history of myocardial infarction, baseline high blood cholesterol, baseline high blood pressure, alcohol intake, multivitamin use, daily intake of total                                                                                         |
|        |               |    |              |         |                                       |                                                             |                | 1-<4/mo     | 0.84 (0.69, 1.03) |                                                                                                                                                                                                                                                                                                                                                       |
|        |               |    |              |         |                                       |                                                             |                | 1-<3/wk     | 0.95 (0.77, 1.17) |                                                                                                                                                                                                                                                                                                                                                       |
|        |               |    |              |         |                                       |                                                             |                | 3-<5/wk     | 0.76 (0.59, 0.99) |                                                                                                                                                                                                                                                                                                                                                       |
|        |               |    |              |         |                                       |                                                             |                | 5-<7/wk     | 1.32 (0.86, 2.02) |                                                                                                                                                                                                                                                                                                                                                       |
|        |               |    |              |         |                                       |                                                             |                | >1/d        | 0.61 (0.28, 1.31) |                                                                                                                                                                                                                                                                                                                                                       |

|      |               |    |            |         |                                       |                                                             |             |                   |                   |                                                                                                                                                                                                                                                                                                                                                                                                                                   |
|------|---------------|----|------------|---------|---------------------------------------|-------------------------------------------------------------|-------------|-------------------|-------------------|-----------------------------------------------------------------------------------------------------------------------------------------------------------------------------------------------------------------------------------------------------------------------------------------------------------------------------------------------------------------------------------------------------------------------------------|
|      |               |    |            |         |                                       |                                                             |             | Per 1 egg/d       | 0.97 (0.71, 1.33) | calories, full-fat milk, bacon, red meat, other processed meats, refined grains, fruits, vegetables, potatoes, coffee, fruit juices, and sugar-sweetened beverages.                                                                                                                                                                                                                                                               |
|      |               |    |            |         |                                       | CHD (653)                                                   | <1/mo       | 1.00 (reference)  |                   |                                                                                                                                                                                                                                                                                                                                                                                                                                   |
|      |               |    |            |         |                                       |                                                             | 1-<4/mo     | 0.77 (0.59, 1.01) |                   |                                                                                                                                                                                                                                                                                                                                                                                                                                   |
|      |               |    |            |         |                                       |                                                             | 1-<3/wk     | 0.86 (0.65, 1.14) |                   |                                                                                                                                                                                                                                                                                                                                                                                                                                   |
|      |               |    |            |         |                                       |                                                             | 3-<5/wk     | 0.56 (0.39, 0.81) |                   |                                                                                                                                                                                                                                                                                                                                                                                                                                   |
|      |               |    |            |         |                                       |                                                             | 5-<7/wk     | 1.31 (0.75, 2.27) |                   |                                                                                                                                                                                                                                                                                                                                                                                                                                   |
|      |               |    |            |         |                                       |                                                             | >1/d        | 0.43 (0.13, 1.38) |                   |                                                                                                                                                                                                                                                                                                                                                                                                                                   |
|      |               |    |            |         |                                       |                                                             | Per 1 egg/d | 0.91 (0.59, 1.42) |                   |                                                                                                                                                                                                                                                                                                                                                                                                                                   |
|      |               |    |            |         |                                       | Stroke (576)                                                | <1/mo       | 1.00 (reference)  |                   |                                                                                                                                                                                                                                                                                                                                                                                                                                   |
|      |               |    |            |         |                                       |                                                             | 1-<4/mo     | 0.91 (0.67, 1.22) |                   |                                                                                                                                                                                                                                                                                                                                                                                                                                   |
|      |               |    |            |         |                                       |                                                             | 1-<3/wk     | 1.03 (0.76, 1.40) |                   |                                                                                                                                                                                                                                                                                                                                                                                                                                   |
|      |               |    |            |         |                                       |                                                             | 3-<5/wk     | 1.03 (0.71, 1.50) |                   |                                                                                                                                                                                                                                                                                                                                                                                                                                   |
| HPFS | United States | 26 | 42,055 men | 40-75 y | Self-administered SFHQ, every 4 years | Self-report with or without validation with medical records | CVD (1,725) | <1/mo             | 1.00 (reference)  | Age, calendar time, smoking status, BMI, physical activity, postmenopausal hormone use, race, family history of myocardial infarction, baseline high blood cholesterol, baseline high blood pressure, alcohol intake, multivitamin use, daily intake of total calories, full-fat milk, bacon, red meat, other processed meats, refined grains, fruits, vegetables, potatoes, coffee, fruit juices, and sugar-sweetened beverages. |
|      |               |    |            |         |                                       |                                                             |             | 1-<4/mo           | 0.84 (0.61, 1.16) |                                                                                                                                                                                                                                                                                                                                                                                                                                   |
|      |               |    |            |         |                                       |                                                             |             | 1-<3/wk           | 0.99 (0.73, 1.34) |                                                                                                                                                                                                                                                                                                                                                                                                                                   |
|      |               |    |            |         |                                       |                                                             |             | 3-<5/wk           | 1.06 (0.77, 1.45) |                                                                                                                                                                                                                                                                                                                                                                                                                                   |
|      |               |    |            |         |                                       |                                                             |             | 5-<7/wk           | 1.23 (0.85, 1.78) |                                                                                                                                                                                                                                                                                                                                                                                                                                   |
|      |               |    |            |         |                                       |                                                             |             | >1/d              | 1.26 (0.84, 1.88) |                                                                                                                                                                                                                                                                                                                                                                                                                                   |
|      |               |    |            |         |                                       |                                                             |             | Per 1 egg/d       | 1.29 (1.08, 1.54) |                                                                                                                                                                                                                                                                                                                                                                                                                                   |
|      |               |    |            |         |                                       |                                                             | CVD (226)   | <1/mo             | 1.00 (reference)  |                                                                                                                                                                                                                                                                                                                                                                                                                                   |
|      |               |    |            |         |                                       |                                                             |             | 1-<4/mo           | 0.44 (0.26, 0.75) |                                                                                                                                                                                                                                                                                                                                                                                                                                   |
|      |               |    |            |         |                                       |                                                             |             | 1-<3/wk           | 0.44 (0.26, 0.74) |                                                                                                                                                                                                                                                                                                                                                                                                                                   |
|      |               |    |            |         |                                       |                                                             |             | 3-<5/wk           | 0.39 (0.21, 0.73) |                                                                                                                                                                                                                                                                                                                                                                                                                                   |
|      |               |    |            |         |                                       |                                                             |             | 5-<7/wk           | 0.66 (0.25, 1.73) |                                                                                                                                                                                                                                                                                                                                                                                                                                   |
|      |               |    |            |         |                                       |                                                             |             | >1/d              | 0.57 (0.17, 1.91) |                                                                                                                                                                                                                                                                                                                                                                                                                                   |

|                      |                          |               |    |                      |         |                                            |                                                                                                                                                                                                                    |                    |             |                   |                                                                                                                                                                                                                                |
|----------------------|--------------------------|---------------|----|----------------------|---------|--------------------------------------------|--------------------------------------------------------------------------------------------------------------------------------------------------------------------------------------------------------------------|--------------------|-------------|-------------------|--------------------------------------------------------------------------------------------------------------------------------------------------------------------------------------------------------------------------------|
|                      |                          |               |    |                      |         |                                            |                                                                                                                                                                                                                    |                    | Per 1 egg/d | 1.02 (0.52, 2.00) |                                                                                                                                                                                                                                |
|                      |                          |               |    |                      |         |                                            |                                                                                                                                                                                                                    | CVD (1,038)        | <1/mo       | 1.00 (reference)  |                                                                                                                                                                                                                                |
|                      |                          |               |    |                      |         |                                            |                                                                                                                                                                                                                    |                    | 1-<4/mo     | 1.06 (0.78, 1.45) |                                                                                                                                                                                                                                |
|                      |                          |               |    |                      |         |                                            |                                                                                                                                                                                                                    |                    | 1-<3/wk     | 1.00 (0.74, 1.36) |                                                                                                                                                                                                                                |
|                      |                          |               |    |                      |         |                                            |                                                                                                                                                                                                                    |                    | 3-<5/wk     | 0.99 (0.71, 1.37) |                                                                                                                                                                                                                                |
|                      |                          |               |    |                      |         |                                            |                                                                                                                                                                                                                    |                    | 5-<7/wk     | 1.05 (0.68, 1.63) |                                                                                                                                                                                                                                |
|                      |                          |               |    |                      |         |                                            |                                                                                                                                                                                                                    |                    | >1/d        | 1.05 (0.69, 1.61) |                                                                                                                                                                                                                                |
|                      |                          |               |    |                      |         |                                            |                                                                                                                                                                                                                    |                    | Per 1 egg/d | 0.93 (0.75, 1.16) |                                                                                                                                                                                                                                |
| Farvid et al. 2017   | Golestan Cohort Study    | Iran          | 11 | 42,403 men and women | 36-85 y | Interviewer administered FFQ baseline only | Reported by family members, friends, or local health workers during annual telephone calls, and a physician visited the house to complete a validated verbal autopsy questionnaire by interviewing the next of kin | CVD death (1,467)  | 0.00/d      | 1.00 (reference)  | Gender, age, ethnicity, education, marital status, residency, smoking, opium use, alcohol, BMI, systolic blood pressure, occupational physical activity, family history of cancer, wealth score, medication and energy intake. |
|                      |                          |               |    |                      |         |                                            |                                                                                                                                                                                                                    |                    | 0.06/d      | 1.01 (0.87, 1.16) |                                                                                                                                                                                                                                |
|                      |                          |               |    |                      |         |                                            |                                                                                                                                                                                                                    |                    | 0.18/d      | 0.93 (0.80, 1.08) |                                                                                                                                                                                                                                |
|                      |                          |               |    |                      |         |                                            |                                                                                                                                                                                                                    |                    | 0.48/d      | 0.92 (0.79, 1.07) |                                                                                                                                                                                                                                |
|                      |                          |               |    |                      |         |                                            |                                                                                                                                                                                                                    |                    | Per 3/wk    | 0.92 (0.81, 1.05) |                                                                                                                                                                                                                                |
|                      |                          |               |    |                      |         |                                            |                                                                                                                                                                                                                    | CHD death (764)    | 0.00/d      | 1.00 (reference)  |                                                                                                                                                                                                                                |
|                      |                          |               |    |                      |         |                                            |                                                                                                                                                                                                                    |                    | 0.06/d      | 1.03 (0.84, 1.26) |                                                                                                                                                                                                                                |
|                      |                          |               |    |                      |         |                                            |                                                                                                                                                                                                                    |                    | 0.18/d      | 0.99 (0.80, 1.21) |                                                                                                                                                                                                                                |
|                      |                          |               |    |                      |         |                                            |                                                                                                                                                                                                                    |                    | 0.48/d      | 0.92 (0.74, 1.14) |                                                                                                                                                                                                                                |
|                      |                          |               |    |                      |         |                                            |                                                                                                                                                                                                                    |                    | Per 3/wk    | 0.91 (0.77, 1.09) |                                                                                                                                                                                                                                |
|                      |                          |               |    |                      |         |                                            |                                                                                                                                                                                                                    | Stroke death (507) | 0.00/d      | 1.00 (reference)  |                                                                                                                                                                                                                                |
|                      |                          |               |    |                      |         |                                            |                                                                                                                                                                                                                    |                    | 0.06/d      | 1.00 (0.79, 1.26) |                                                                                                                                                                                                                                |
|                      |                          |               |    |                      |         |                                            |                                                                                                                                                                                                                    |                    | 0.18/d      | 0.80 (0.62, 1.04) |                                                                                                                                                                                                                                |
|                      |                          |               |    |                      |         |                                            |                                                                                                                                                                                                                    |                    | 0.48/d      | 0.94 (0.73, 1.21) |                                                                                                                                                                                                                                |
|                      |                          |               |    |                      |         |                                            |                                                                                                                                                                                                                    |                    | Per 3/wk    | 0.94 (0.75, 1.17) |                                                                                                                                                                                                                                |
| Goldberg et al. 2014 | Northern Manhattan Study | United States | 11 | 2,669 men and women  | >40 y   | Interviewer-administered                   | Detected through ongoing hospital surveillance of                                                                                                                                                                  | CVD (719)          | <1/mo       | 1.00 (reference)  | Age, sex, race/ethnicity, BMI, diabetes, hypertension, LDL-C,                                                                                                                                                                  |
|                      |                          |               |    |                      |         |                                            |                                                                                                                                                                                                                    |                    | 1/mo        | 0.94 (0.75, 1.16) |                                                                                                                                                                                                                                |

|                 |      |                |      |           |         |                             |                                                                                                                                                                                                                  |              |              |                   |                                                                                                                                                                                                                                                                                                                                  |
|-----------------|------|----------------|------|-----------|---------|-----------------------------|------------------------------------------------------------------------------------------------------------------------------------------------------------------------------------------------------------------|--------------|--------------|-------------------|----------------------------------------------------------------------------------------------------------------------------------------------------------------------------------------------------------------------------------------------------------------------------------------------------------------------------------|
|                 |      |                |      |           |         |                             |                                                                                                                                                                                                                  |              | 2-3/mo       | 0.85 (0.66, 1.09) | HDL-C, TG, cholesterol lowering medication, moderate alcohol use, moderate-heavy physical activity, smoking, high-school completion, energy intake, Mediterranean diet score, family history of stroke in siblings, family history of MI in siblings, consumption of saturated and unsaturated fats, carbohydrates and proteins. |
|                 |      |                |      |           |         |                             |                                                                                                                                                                                                                  |              | 1/wk         | 0.96 (0.79, 1.18) |                                                                                                                                                                                                                                                                                                                                  |
|                 |      |                |      |           |         |                             |                                                                                                                                                                                                                  |              | >2/wk        | 1.03 (0.67, 1.60) |                                                                                                                                                                                                                                                                                                                                  |
|                 |      |                |      |           |         |                             |                                                                                                                                                                                                                  |              | Per 1 egg/wk | 1.05 (0.95, 1.16) |                                                                                                                                                                                                                                                                                                                                  |
|                 |      |                |      |           |         |                             | Stroke (266)                                                                                                                                                                                                     |              | <1/mo        | 1.00 (reference)  |                                                                                                                                                                                                                                                                                                                                  |
|                 |      |                |      |           |         |                             |                                                                                                                                                                                                                  |              | 1/mo         | 0.97 (0.69, 1.37) |                                                                                                                                                                                                                                                                                                                                  |
|                 |      |                |      |           |         |                             |                                                                                                                                                                                                                  |              | 2-3/mo       | 0.76 (0.50, 1.14) |                                                                                                                                                                                                                                                                                                                                  |
|                 |      |                |      |           |         |                             |                                                                                                                                                                                                                  |              | 1/wk         | 0.83 (0.60, 1.16) |                                                                                                                                                                                                                                                                                                                                  |
|                 |      |                |      |           |         |                             |                                                                                                                                                                                                                  |              | >2/wk        | 1.18 (0.60, 2.30) |                                                                                                                                                                                                                                                                                                                                  |
|                 |      |                |      |           |         |                             |                                                                                                                                                                                                                  |              | Per 1 egg/wk | 1.04 (0.88, 1.22) |                                                                                                                                                                                                                                                                                                                                  |
|                 |      |                |      |           |         |                             | CHD (226)                                                                                                                                                                                                        |              | <1/mo        | 1.00 (reference)  |                                                                                                                                                                                                                                                                                                                                  |
|                 |      |                |      |           |         |                             |                                                                                                                                                                                                                  |              | 1/mo         | 0.83 (0.57, 1.22) |                                                                                                                                                                                                                                                                                                                                  |
|                 |      |                |      |           |         |                             |                                                                                                                                                                                                                  |              | 2-3/mo       | 0.66 (0.40, 1.06) |                                                                                                                                                                                                                                                                                                                                  |
|                 |      |                |      |           |         |                             |                                                                                                                                                                                                                  |              | 1/wk         | 1.09 (0.77, 1.55) |                                                                                                                                                                                                                                                                                                                                  |
|                 |      |                |      |           |         |                             |                                                                                                                                                                                                                  |              | >2/wk        | 0.81 (0.34, 1.93) |                                                                                                                                                                                                                                                                                                                                  |
|                 |      |                |      |           |         |                             |                                                                                                                                                                                                                  |              | Per 1 egg/wk | 1.04 (0.87, 1.26) |                                                                                                                                                                                                                                                                                                                                  |
| Guo et al. 2018 | CAPS | United Kingdom | 22.8 | 1,781 men | 45-59 y | SFFQ, updated every 5-years | Hospital and general practitioner database, confirmed by two independent expert clinicians and an epidemiologist, including computed tomography, radiological and pathological information and National Registry | CVD (715)    | 0-1/wk       | 1.00 (reference)  | Age, BMI, total energy intake, alcohol consumption, smoking, energy expenditure, social class, family history of myocardial infarction, diabetes mellitus, sugar intake, fruit consumption, red meat consumption and fiber intake.                                                                                               |
|                 |      |                |      |           |         |                             |                                                                                                                                                                                                                  |              | 1-2/wk       | 0.98 (0.76, 1.26) |                                                                                                                                                                                                                                                                                                                                  |
|                 |      |                |      |           |         |                             |                                                                                                                                                                                                                  |              | 2-3/wk       | 1.14 (0.89, 1.46) |                                                                                                                                                                                                                                                                                                                                  |
|                 |      |                |      |           |         |                             |                                                                                                                                                                                                                  |              | 3-5/wk       | 1.01 (0.77, 1.33) |                                                                                                                                                                                                                                                                                                                                  |
|                 |      |                |      |           |         |                             |                                                                                                                                                                                                                  |              | >5/wk        | 1.25 (0.94, 1.66) |                                                                                                                                                                                                                                                                                                                                  |
|                 |      |                |      |           |         |                             |                                                                                                                                                                                                                  | Stroke (248) | 0-1/wk       | 1.00 (reference)  |                                                                                                                                                                                                                                                                                                                                  |
|                 |      |                |      |           |         |                             |                                                                                                                                                                                                                  |              | 1-2/wk       | 1.01 (0.65, 1.56) |                                                                                                                                                                                                                                                                                                                                  |
|                 |      |                |      |           |         |                             |                                                                                                                                                                                                                  |              | 2-3/wk       | 1.00 (0.64, 1.55) |                                                                                                                                                                                                                                                                                                                                  |
|                 |      |                |      |           |         |                             |                                                                                                                                                                                                                  |              | 3-5/wk       | 1.15 (0.72, 1.84) |                                                                                                                                                                                                                                                                                                                                  |

|                     |                                                       |                                                           |      |                               |         |                                         |                                                                                                                               |             |        |                   |                                                                                                                                                                                                                                                                                                                |
|---------------------|-------------------------------------------------------|-----------------------------------------------------------|------|-------------------------------|---------|-----------------------------------------|-------------------------------------------------------------------------------------------------------------------------------|-------------|--------|-------------------|----------------------------------------------------------------------------------------------------------------------------------------------------------------------------------------------------------------------------------------------------------------------------------------------------------------|
|                     |                                                       |                                                           |      |                               |         |                                         |                                                                                                                               |             | >5/wk  | 1.60 (1.00, 2.57) |                                                                                                                                                                                                                                                                                                                |
|                     |                                                       |                                                           |      |                               |         |                                         |                                                                                                                               | CHD (477)   | 0-1/wk | 1.00 (reference)  |                                                                                                                                                                                                                                                                                                                |
|                     |                                                       |                                                           |      |                               |         |                                         |                                                                                                                               |             | 1-2/wk | 0.97 (0.72, 1.31) |                                                                                                                                                                                                                                                                                                                |
|                     |                                                       |                                                           |      |                               |         |                                         |                                                                                                                               |             | 2-3/wk | 1.14 (0.85, 1.52) |                                                                                                                                                                                                                                                                                                                |
|                     |                                                       |                                                           |      |                               |         |                                         |                                                                                                                               |             | 3-5/wk | 1.01 (0.72, 1.4)  |                                                                                                                                                                                                                                                                                                                |
|                     |                                                       |                                                           |      |                               |         |                                         |                                                                                                                               |             | >5/wk  | 0.91 (0.64, 1.31) |                                                                                                                                                                                                                                                                                                                |
| Houston et al. 2011 | Health, Aging and Body Composition (Health ABC) Study | United States                                             | 9    | 1,600 men and women (non-T2D) | 70-79 y | Interviewer-administered FFQ, at year 2 | Annual in-person clinic exams, semi-annual phone interviews, medical record and death certificate                             | CVD (158)   | <1/wk  | 1.00 (reference)  | Age, sex, race, education, field center, smoking, alcohol use, physical activity, BMI, total energy intake, protein intake, fiber intake, multivitamin use,                                                                                                                                                    |
|                     |                                                       |                                                           |      |                               |         |                                         |                                                                                                                               |             | 1-2/wk | 1.03 (0.71, 1.49) | supplemental vitamin E use, statin use, aspirin use, oral estrogen use (women), prevalent hypertension, saturated fatty acid intake.                                                                                                                                                                           |
|                     |                                                       |                                                           |      |                               |         |                                         |                                                                                                                               |             | >3/wk  | 1.38 (0.88, 2.16) |                                                                                                                                                                                                                                                                                                                |
|                     |                                                       |                                                           |      | 31 men and women (T2D)        | 70-79 y | Interviewer-administered FFQ, at year 2 | Annual in-person clinic exams, semi-annual phone interviews, medical record and death certificate                             | CVD (45)    | <1/wk  | 1.00 (reference)  |                                                                                                                                                                                                                                                                                                                |
|                     |                                                       |                                                           |      |                               |         |                                         |                                                                                                                               |             | 1-2/wk | 3.33(1.18, 9.41)  |                                                                                                                                                                                                                                                                                                                |
|                     |                                                       |                                                           |      |                               |         |                                         |                                                                                                                               |             | >3/wk  | 5.02(1.63, 15.52) |                                                                                                                                                                                                                                                                                                                |
| Jang et al. 2018    | Korean Genome and Epidemiology Study                  | Korea                                                     | 7.3  | 9,248 men and women           | 40-69 y | SFFQ, baseline and second follow-up     | Identified through biennial questionnaires, and all reported cases were confirmed by trained staff during personal interviews | CVD (570)   | 0.1/wk | 1.00 (reference)  | Age, sex, educational level, residential area, monthly household income, alcohol drinking, smoking in pack-years, physical activity level, dietary supplement use, history of hypertension and dyslipidemia, and intakes of total energy, total vegetables, total fruits, red meat, fiber, vitamin E, and BMI. |
|                     |                                                       |                                                           |      |                               |         |                                         |                                                                                                                               |             | 0.7/wk | 1.27 (0.99, 1.61) |                                                                                                                                                                                                                                                                                                                |
|                     |                                                       |                                                           |      |                               |         |                                         |                                                                                                                               |             | 1.6/wk | 1.23 (0.95, 1.60) |                                                                                                                                                                                                                                                                                                                |
|                     |                                                       |                                                           |      |                               |         |                                         |                                                                                                                               |             | 4.2/wk | 1.14 (0.87, 1.49) |                                                                                                                                                                                                                                                                                                                |
| Key et al. 2019     | EPIC                                                  | Denmark, Norway, Sweden, France, Netherlands, UK, Greece, | 12.6 | 409,885 men and women         | 21-83 y | FFQ, baseline only                      | Record linkage to morbidity or hospital registries, and self-reports followed by confirmation with medical                    | CHD (7,198) | 4 g/d  | 1.00 (reference)  | Age, smoking status, number of cigarettes per day, history of diabetes, previous hypertension, prior hyperlipidemia, Cambridge physical activity index,                                                                                                                                                        |
|                     |                                                       |                                                           |      |                               |         |                                         |                                                                                                                               |             | 9 g/d  | 0.96 (0.89-1.04)  |                                                                                                                                                                                                                                                                                                                |
|                     |                                                       |                                                           |      |                               |         |                                         |                                                                                                                               |             | 15 g/d | 0.97 (0.90-1.05)  |                                                                                                                                                                                                                                                                                                                |
|                     |                                                       |                                                           |      |                               |         |                                         |                                                                                                                               |             | 22 g/d | 1.02 (0.94-1.09)  |                                                                                                                                                                                                                                                                                                                |

|                     |                            |                       |    |              |         |                     |                                                                                                                                                          |                          |                   |                   |                                                                                                                                                                                                                                                                                                                                             |
|---------------------|----------------------------|-----------------------|----|--------------|---------|---------------------|----------------------------------------------------------------------------------------------------------------------------------------------------------|--------------------------|-------------------|-------------------|---------------------------------------------------------------------------------------------------------------------------------------------------------------------------------------------------------------------------------------------------------------------------------------------------------------------------------------------|
|                     |                            | Italy, Spain, Germany |    |              |         |                     | records; vital status collected from mortality registries at the regional or national level or by active follow-up of study participants and next of kin |                          | 40 g/d            | 0.93 (0.86-1.01)  | employment status, level of education completed, BMI, current alcohol consumption, and intakes of energy, fruit and vegetables combined, sugars and fibre from cereals, sex, and EPIC centre; Dose response analysis further adjusted for intakes of red and processed meat, poultry meat, white fish, fatty fish, milk, yogurt and cheese. |
|                     |                            |                       |    |              |         |                     |                                                                                                                                                          | Per 20 g/d               | 0.93 (0.88, 0.99) |                   |                                                                                                                                                                                                                                                                                                                                             |
| Larsson et al. 2015 | Cohort of Swedish Men      | Sweden                | 13 | 37,766 men   | 45-79 y | SFFQ, baseline only | Confirmed by Swedish National Patient and Cause of Death Registers                                                                                       | CHD (3,262)              | 0-3/mo            | 1.00 (reference)  | Age, education, family history of CHD before 60 y of age, smoking status and pack-years of smoking, aspirin use, walking/cycling, exercise, BMI, history of hypertension, hypercholesterolemia, and diabetes, and intakes of total energy, alcohol, fruits and vegetables, and processed meat.                                              |
|                     |                            |                       |    |              |         |                     |                                                                                                                                                          |                          | 1-2/wk            | 0.98 (0.90, 1.05) |                                                                                                                                                                                                                                                                                                                                             |
|                     |                            |                       |    |              |         |                     |                                                                                                                                                          |                          | 3-6/wk            | 0.95 (0.84, 1.08) |                                                                                                                                                                                                                                                                                                                                             |
|                     |                            |                       |    |              |         |                     |                                                                                                                                                          |                          | 1.2/d             | 1.03 (0.84, 1.27) |                                                                                                                                                                                                                                                                                                                                             |
|                     |                            |                       |    |              |         |                     |                                                                                                                                                          | Ischemic stroke (2,039)  | 0-3/mo            | 1.00 (reference)  |                                                                                                                                                                                                                                                                                                                                             |
|                     |                            |                       |    |              |         |                     |                                                                                                                                                          |                          | 1-2/wk            | 0.91 (0.83, 1.00) |                                                                                                                                                                                                                                                                                                                                             |
|                     |                            |                       |    |              |         |                     |                                                                                                                                                          |                          | 3-6/wk            | 1.07 (0.92, 1.24) |                                                                                                                                                                                                                                                                                                                                             |
|                     |                            |                       |    |              |         |                     |                                                                                                                                                          |                          | 1.2/d             | 0.87 (0.66, 1.14) |                                                                                                                                                                                                                                                                                                                                             |
|                     |                            |                       |    |              |         |                     |                                                                                                                                                          | Hemorrhagic stroke (405) | 0-3/mo            | 1.00 (reference)  |                                                                                                                                                                                                                                                                                                                                             |
|                     |                            |                       |    |              |         |                     |                                                                                                                                                          |                          | 1-2/wk            | 0.91 (0.73, 1.14) |                                                                                                                                                                                                                                                                                                                                             |
|                     |                            |                       |    |              |         |                     |                                                                                                                                                          |                          | 3-6/wk            | 1.04 (0.74, 1.45) |                                                                                                                                                                                                                                                                                                                                             |
|                     |                            |                       |    |              |         |                     |                                                                                                                                                          |                          | 1.2/d             | 1.05 (0.59, 1.88) |                                                                                                                                                                                                                                                                                                                                             |
|                     | Swedish Mammography Cohort | Sweden                | 13 | 32,805 women | 49-83 y | SFFQ, baseline only | Confirmed by Swedish National Patient and Cause of Death Registers                                                                                       | CHD (1,504)              | 0-3/mo            | 1.00 (reference)  |                                                                                                                                                                                                                                                                                                                                             |
|                     |                            |                       |    |              |         |                     |                                                                                                                                                          |                          | 1-2/wk            | 0.94 (0.84, 1.05) |                                                                                                                                                                                                                                                                                                                                             |
|                     |                            |                       |    |              |         |                     |                                                                                                                                                          |                          | 3-6/wk            | 1.03 (0.86, 1.24) |                                                                                                                                                                                                                                                                                                                                             |
|                     |                            |                       |    |              |         |                     |                                                                                                                                                          |                          | 1.1/d             | 0.85 (0.59, 1.23) |                                                                                                                                                                                                                                                                                                                                             |



|                      |                    |                |      |                     |         |                                      |                                                                                               |                          |        |                   |                                                                                                                                                           |
|----------------------|--------------------|----------------|------|---------------------|---------|--------------------------------------|-----------------------------------------------------------------------------------------------|--------------------------|--------|-------------------|-----------------------------------------------------------------------------------------------------------------------------------------------------------|
|                      |                    |                |      |                     |         |                                      |                                                                                               | Ischemic stroke (1,561)  | 0-3/mo | 1.00 (reference)  | history of hypertension, hypercholesterolemia and diabetes, intakes of total energy, alcohol, fruits and vegetables, and processed meat.                  |
|                      |                    |                |      |                     |         |                                      |                                                                                               |                          | 1-2/wk | 1.06 (0.95, 1.19) |                                                                                                                                                           |
|                      |                    |                |      |                     |         |                                      |                                                                                               |                          | 3-6/wk | 1.07 (0.90, 1.28) |                                                                                                                                                           |
|                      |                    |                |      |                     |         |                                      |                                                                                               |                          | 1.1/d  | 1.06 (0.76, 1.47) |                                                                                                                                                           |
|                      |                    |                |      |                     |         |                                      |                                                                                               | Hemorrhagic stroke (294) | 0-3/mo | 1.00 (ref)        |                                                                                                                                                           |
|                      |                    |                |      |                     |         |                                      |                                                                                               |                          | 1-2/wk | 1.06 (0.82, 1.36) |                                                                                                                                                           |
|                      |                    |                |      |                     |         |                                      |                                                                                               |                          | 3-6/wk | 0.80 (0.52, 1.25) |                                                                                                                                                           |
|                      |                    |                |      |                     |         |                                      |                                                                                               |                          | 1.1/d  | 0.96 (0.44, 2.12) |                                                                                                                                                           |
| Mann et al. 1997     | Vegetarian Society | United Kingdom | 13.3 | 9,980 men and women | 16-79 y | Self-administered SFFQ Baseline only | Confirmed by the National Health Service Central Register                                     | CHD death (64)           | <1/wk  | 1.00 (reference)  | Age, sex, smoking and social class.                                                                                                                       |
|                      |                    |                |      |                     |         |                                      |                                                                                               |                          | 1-5/wk | 1.28(0.59, 2.79)  |                                                                                                                                                           |
|                      |                    |                |      |                     |         |                                      |                                                                                               |                          | ≥6/wk  | 2.68(1.19, 6.02)  |                                                                                                                                                           |
| Nakamura et al. 2004 | NIPPON DATA80      | Japan          | 14   | 4,077 men           | ≥30 y   | Self-administered FFQ baseline only  | Confirmed by National Registry (computer matching of data from the National Vital Statistics) | CHD death (39)           | 1/d    | 1.00 (reference)  | Age, serum creatinine, total cholesterol, blood glucose, BMI, systolic and diastolic BP, use of BP-lowering drugs, cigarette smoking, and alcohol intake. |
|                      |                    |                |      |                     |         |                                      |                                                                                               |                          | 0.5 d  | 1.49 (0.63, 3.48) |                                                                                                                                                           |
|                      |                    |                |      |                     |         |                                      |                                                                                               |                          | 1-2/wk | 1.71 (0.78, 3.76) |                                                                                                                                                           |
|                      |                    |                |      |                     |         |                                      |                                                                                               |                          | Seldom | 1.18 (0.26, 5.42) |                                                                                                                                                           |
|                      |                    |                |      |                     |         |                                      |                                                                                               | Stroke death (112)       | >2/d   | 0.25 (0.03, 1.81) |                                                                                                                                                           |
|                      |                    |                |      |                     |         |                                      |                                                                                               |                          | 1/d    | 1.00 (reference)  |                                                                                                                                                           |
|                      |                    |                |      |                     |         |                                      |                                                                                               |                          | 0.5 d  | 1.10 (0.68, 1.76) |                                                                                                                                                           |
|                      |                    |                |      |                     |         |                                      |                                                                                               |                          | 1-2/wk | 1.09 (0.69, 1.72) |                                                                                                                                                           |
|                      |                    |                |      |                     |         |                                      |                                                                                               |                          | Seldom | 0.93 (0.36, 2.40) |                                                                                                                                                           |
|                      |                    |                |      | 5,186 women         | ≥30 y   | Self-administered FFQ baseline only  | Confirmed by National Registry (computer matching of data from the National Vital Statistics) | CHD death (41)           | >2/d   | 1.27 (0.16, 9.80) | Age, serum creatinine, total cholesterol, blood glucose, BMI, systolic and diastolic BP, use of BP-lowering drugs, cigarette smoking and alcohol intake.  |
|                      |                    |                |      |                     |         |                                      |                                                                                               |                          | 1/d    | 1.00 (reference)  |                                                                                                                                                           |
|                      |                    |                |      |                     |         |                                      |                                                                                               |                          | 0.5 d  | 0.78 (0.35, 1.82) |                                                                                                                                                           |
|                      |                    |                |      |                     |         |                                      |                                                                                               |                          | 1-2/wk | 0.64 (0.28, 1.44) |                                                                                                                                                           |
|                      |                    |                |      |                     |         |                                      |                                                                                               |                          | Seldom | 1.42 (0.56, 3.62) |                                                                                                                                                           |

|                          |                                                         |                  |      |                                 |         |                                                          |                                                                                                                        |                       |                       |                      |                                                                                                                                                                                                                                                                               |
|--------------------------|---------------------------------------------------------|------------------|------|---------------------------------|---------|----------------------------------------------------------|------------------------------------------------------------------------------------------------------------------------|-----------------------|-----------------------|----------------------|-------------------------------------------------------------------------------------------------------------------------------------------------------------------------------------------------------------------------------------------------------------------------------|
|                          |                                                         |                  |      |                                 |         |                                                          |                                                                                                                        | Stroke death<br>(107) | >2/d                  | 1.22 (0.29,<br>5.17) |                                                                                                                                                                                                                                                                               |
|                          |                                                         |                  |      |                                 |         |                                                          |                                                                                                                        |                       | 1/d                   | 1.00<br>(reference)  |                                                                                                                                                                                                                                                                               |
|                          |                                                         |                  |      |                                 |         |                                                          |                                                                                                                        |                       | 1/2 d                 | 1.46 (0.89,<br>2.40) |                                                                                                                                                                                                                                                                               |
|                          |                                                         |                  |      |                                 |         |                                                          |                                                                                                                        |                       | 1-2/wk                | 0.79 (0.47,<br>1.33) |                                                                                                                                                                                                                                                                               |
|                          |                                                         |                  |      |                                 |         |                                                          |                                                                                                                        |                       | Seldom                | 0.78 (0.35,<br>1.73) |                                                                                                                                                                                                                                                                               |
| Nakamura et al.<br>2006  | Japan Public Health<br>Centerbased prospective<br>study | Japan            | 10.2 | 90,735 men<br>and women         | 40-69 y | Self-administered<br>questionnaire,<br>baseline only     | Confirmed by<br>medical records,<br>letter, telephone<br>or death<br>certificate                                       | CHD (3,587)           | <1/wk                 | 1.19 (0.86,<br>1.64) | Age, sex, BMI,<br>hypertension,<br>diabetes, use of<br>cholesterol lowering<br>drugs, smoking,<br>alcohol drinking,<br>whether participants<br>intended to avoid<br>cholesterol rich diets,<br>consumption of meat,<br>fish, vegetables, and<br>fruits and cohort<br>effects. |
|                          |                                                         |                  |      |                                 |         |                                                          |                                                                                                                        |                       | 1-2/wk                | 1.00 (0.77, 1.3)     |                                                                                                                                                                                                                                                                               |
|                          |                                                         |                  |      |                                 |         |                                                          |                                                                                                                        |                       | 3-4/wk                | 1.00 (0.79,<br>1.26) |                                                                                                                                                                                                                                                                               |
|                          |                                                         |                  |      |                                 |         |                                                          |                                                                                                                        |                       | Almost daily          | 1.00<br>(reference)  |                                                                                                                                                                                                                                                                               |
| Nakamura et al.<br>2018  | NIPPON DATA90                                           | Japan            | 15   | 4,686<br>women                  | ≥30 y   | Self-administered<br>questionnaire baseline<br>only      | Identified<br>through the<br>National Vital<br>Statistics                                                              | CVD death<br>(183)    | <1/week               | 1.09 (0.60,<br>1.97) | Age, BMI,<br>BMIxBMI,<br>hypertension,<br>diabetes, cigarette<br>smoking, alcohol<br>drinking,<br>dyslipidemia therapy,<br>intake of fiber, meat<br>and sodium.                                                                                                               |
|                          |                                                         |                  |      |                                 |         |                                                          |                                                                                                                        |                       | 1-2/week              | 1.16 (0.81,<br>1.67) |                                                                                                                                                                                                                                                                               |
|                          |                                                         |                  |      |                                 |         |                                                          |                                                                                                                        |                       | 0.5/d                 | 0.92 (0.61,<br>1.38) |                                                                                                                                                                                                                                                                               |
|                          |                                                         |                  |      |                                 |         |                                                          |                                                                                                                        |                       | 1/d                   | 1.00<br>(reference)  |                                                                                                                                                                                                                                                                               |
|                          |                                                         |                  |      |                                 |         |                                                          |                                                                                                                        |                       | >2/day                | 1.24 (0.38,<br>4.10) |                                                                                                                                                                                                                                                                               |
| Nettleton et al.<br>2008 | ARIC                                                    | United<br>States | 13.3 | 7,082 men<br>and 8,710<br>women | 45-64 y | Interviewer-<br>administered FFQ,<br>baseline and Exam 3 | Confirmed by<br>county death<br>certificates and<br>local hospital<br>discharge lists                                  | HF (1,140)            | Per 1 servig<br>egg/d | 1.23(1.08,1.41)      | Energy intake, age,<br>sex, race/center,<br>education level,<br>physical activity<br>level, smoking,<br>drinking status,<br>prevalent disease<br>status: cardiovascular<br>disease, diabetes, and<br>hypertension.                                                            |
| Pan et al. 2021          | SCCS                                                    | United<br>States | 12   | 47,789 Black<br>Americans       | 40-79 y | FFQ, baseline only                                       | Linkage of the<br>cohort to the<br>National Death<br>Index and Social<br>Security<br>Administration<br>mortality files | CHD death<br>(1,179)  | 1/wk                  | 1.00<br>(reference)  | Age, sex, education,<br>annual income,<br>marital status, total<br>energy intake,<br>smoking status,<br>smoking pack-years,<br>alcohol consumption,<br>physical activity                                                                                                      |
|                          |                                                         |                  |      |                                 |         |                                                          |                                                                                                                        |                       | 3/wk                  | 1.05(0.97,<br>1.13)  |                                                                                                                                                                                                                                                                               |
|                          |                                                         |                  |      |                                 |         |                                                          |                                                                                                                        |                       | 5/wk                  | 1.07(0.95,<br>1.20)  |                                                                                                                                                                                                                                                                               |
|                          |                                                         |                  |      |                                 |         |                                                          |                                                                                                                        |                       | 7/wk                  | 1.06(0.93,<br>1.21)  |                                                                                                                                                                                                                                                                               |

|                        |         |                    |                                                                                                      |                 |                    |                                                   |                                                                                                                                                                                                                                                                                                                                          |       |                  |                                                                                                                                                                                                                                                                                                                                   |
|------------------------|---------|--------------------|------------------------------------------------------------------------------------------------------|-----------------|--------------------|---------------------------------------------------|------------------------------------------------------------------------------------------------------------------------------------------------------------------------------------------------------------------------------------------------------------------------------------------------------------------------------------------|-------|------------------|-----------------------------------------------------------------------------------------------------------------------------------------------------------------------------------------------------------------------------------------------------------------------------------------------------------------------------------|
|                        |         |                    |                                                                                                      |                 |                    |                                                   |                                                                                                                                                                                                                                                                                                                                          | 10/wk | 1.01(0.88, 1.16) | level, body mass index, healthy eating index, history of diabetes, hypertension, dyslipidemia, coronary heart disease, and stroke, and hormone replacement therapy (for women only).                                                                                                                                              |
|                        |         |                    |                                                                                                      |                 |                    |                                                   | Stroke death (577)                                                                                                                                                                                                                                                                                                                       | 1/wk  | 1.00 (reference) |                                                                                                                                                                                                                                                                                                                                   |
|                        |         |                    |                                                                                                      |                 |                    |                                                   |                                                                                                                                                                                                                                                                                                                                          | 3/wk  | 1.01(0.90, 1.12) |                                                                                                                                                                                                                                                                                                                                   |
|                        |         |                    |                                                                                                      |                 |                    |                                                   |                                                                                                                                                                                                                                                                                                                                          | 5/wk  | 1.02(0.86, 1.20) |                                                                                                                                                                                                                                                                                                                                   |
|                        |         |                    |                                                                                                      |                 |                    |                                                   |                                                                                                                                                                                                                                                                                                                                          | 7/wk  | 1.03(0.85, 1.24) |                                                                                                                                                                                                                                                                                                                                   |
|                        |         |                    |                                                                                                      |                 |                    |                                                   |                                                                                                                                                                                                                                                                                                                                          | 10/wk | 1.05(0.86, 1.28) |                                                                                                                                                                                                                                                                                                                                   |
| 20,360 White Americans | 40-79 y | FFQ, baseline only | Linkage of the cohort to the National Death Index and Social Security Administration mortality files | CHD death (595) | 1/wk               | 1.00 (reference)                                  | Age, sex, education, annual income, marital status, total energy intake, smoking status, smoking pack-years, alcohol consumption, physical activity level, body mass index, healthy eating index, history of diabetes, hypertension, dyslipidemia, coronary heart disease, and stroke, and hormone replacement therapy (for women only). |       |                  |                                                                                                                                                                                                                                                                                                                                   |
|                        |         |                    |                                                                                                      |                 | 3/wk               | 1.00(0.89, 1.12)                                  |                                                                                                                                                                                                                                                                                                                                          |       |                  |                                                                                                                                                                                                                                                                                                                                   |
|                        |         |                    |                                                                                                      |                 | 5/wk               | 1.03(0.87, 1.21)                                  |                                                                                                                                                                                                                                                                                                                                          |       |                  |                                                                                                                                                                                                                                                                                                                                   |
|                        |         |                    |                                                                                                      |                 | 7/wk               | 1.08(0.91, 1.28)                                  |                                                                                                                                                                                                                                                                                                                                          |       |                  |                                                                                                                                                                                                                                                                                                                                   |
|                        |         |                    |                                                                                                      |                 | 10/wk              | 1.20(0.98, 1.47)                                  |                                                                                                                                                                                                                                                                                                                                          |       |                  |                                                                                                                                                                                                                                                                                                                                   |
|                        |         |                    |                                                                                                      |                 | Stroke death (142) | 1/wk                                              | 1.00 (reference)                                                                                                                                                                                                                                                                                                                         |       |                  |                                                                                                                                                                                                                                                                                                                                   |
|                        |         |                    |                                                                                                      |                 |                    | 3/wk                                              | 0.93(0.73, 1.19)                                                                                                                                                                                                                                                                                                                         |       |                  |                                                                                                                                                                                                                                                                                                                                   |
|                        |         |                    |                                                                                                      |                 |                    | 5/wk                                              | 0.96(0.69, 1.34)                                                                                                                                                                                                                                                                                                                         |       |                  |                                                                                                                                                                                                                                                                                                                                   |
|                        |         |                    |                                                                                                      |                 |                    | 7/wk                                              | 1.07(0.75, 1.51)                                                                                                                                                                                                                                                                                                                         |       |                  |                                                                                                                                                                                                                                                                                                                                   |
|                        |         |                    |                                                                                                      |                 |                    | 10/wk                                             | 1.34(0.89, 2.02)                                                                                                                                                                                                                                                                                                                         |       |                  |                                                                                                                                                                                                                                                                                                                                   |
| SMHS, SWHS             | China   | 15.5               | 134,280 Chinese                                                                                      | 40-79 y         | FFQ, baseline only | Linkage to the Shanghai Vital Statistics Registry | CHD death (2,182)                                                                                                                                                                                                                                                                                                                        | 1/wk  | 1.00 (reference) | Age, sex, education, annual income, marital status, total energy intake, smoking status, smoking pack-years, alcohol consumption, physical activity level, body mass index, healthy eating index, history of diabetes, hypertension, dyslipidemia, coronary heart disease, and stroke, and hormone replacement therapy (for women |
|                        |         |                    |                                                                                                      |                 |                    |                                                   |                                                                                                                                                                                                                                                                                                                                          | 3/wk  | 0.96(0.90, 1.04) |                                                                                                                                                                                                                                                                                                                                   |
|                        |         |                    |                                                                                                      |                 |                    |                                                   |                                                                                                                                                                                                                                                                                                                                          | 5/wk  | 0.97(0.88, 1.07) |                                                                                                                                                                                                                                                                                                                                   |
|                        |         |                    |                                                                                                      |                 |                    |                                                   |                                                                                                                                                                                                                                                                                                                                          | 7/wk  | 1.01(0.92, 1.12) |                                                                                                                                                                                                                                                                                                                                   |
|                        |         |                    |                                                                                                      |                 |                    |                                                   |                                                                                                                                                                                                                                                                                                                                          | 10/wk | 1.08(0.95, 1.24) |                                                                                                                                                                                                                                                                                                                                   |
|                        |         |                    |                                                                                                      |                 |                    |                                                   | Stroke death (2955)                                                                                                                                                                                                                                                                                                                      | 1/wk  | 1.00 (reference) |                                                                                                                                                                                                                                                                                                                                   |
|                        |         |                    |                                                                                                      |                 |                    |                                                   |                                                                                                                                                                                                                                                                                                                                          | 3/wk  | 0.94(0.88, 1.00) |                                                                                                                                                                                                                                                                                                                                   |
|                        |         |                    |                                                                                                      |                 |                    |                                                   |                                                                                                                                                                                                                                                                                                                                          | 5/wk  | 0.91(0.84, 0.99) |                                                                                                                                                                                                                                                                                                                                   |
|                        |         |                    |                                                                                                      |                 |                    |                                                   |                                                                                                                                                                                                                                                                                                                                          | 7/wk  | 0.91(0.84, 0.99) |                                                                                                                                                                                                                                                                                                                                   |

| Author                   | Study             | Country          | Age (y) | Sample Size           | Follow-up (y) | Exposure                                                        | Outcome                                                                                                                                                                                                  | HR (95% CI)  | HR (95% CI)                | HR (95% CI)       | Other                                                                                                                                                                                                                                                                                            |                  |
|--------------------------|-------------------|------------------|---------|-----------------------|---------------|-----------------------------------------------------------------|----------------------------------------------------------------------------------------------------------------------------------------------------------------------------------------------------------|--------------|----------------------------|-------------------|--------------------------------------------------------------------------------------------------------------------------------------------------------------------------------------------------------------------------------------------------------------------------------------------------|------------------|
| Qin et al. 2018          | CKB               | China            | 8.9     | 461,213 men and women | 30-79 y       | Interviewer-administered FFQ, baseline, second and third survey | Obtained regularly via local disease and death registries, checked against the national health insurance system with electronic linkage to all hospitalizations, or ascertained through active follow-up | CVD (83,977) | 10/wk                      | 0.92(0.81, 1.03)  | Age at recruitment, sex, education level, household income, marital status, alcohol consumption, tobacco smoking, physical activity in MET-hours/day, BMI, waist to hip ratio, prevalent hypertension, use of aspirin, family history of CVD, multivitamin supplementation, and dietary pattern. |                  |
|                          |                   |                  |         |                       |               |                                                                 |                                                                                                                                                                                                          |              | 0.29/d                     | 0.97 (0.95, 1.00) |                                                                                                                                                                                                                                                                                                  |                  |
|                          |                   |                  |         |                       |               |                                                                 |                                                                                                                                                                                                          |              | 0.36/d                     | 0.97 (0.95, 1.00) |                                                                                                                                                                                                                                                                                                  |                  |
|                          |                   |                  |         |                       |               |                                                                 |                                                                                                                                                                                                          |              | 0.46/d                     | 0.92 (0.90, 0.94) |                                                                                                                                                                                                                                                                                                  |                  |
|                          |                   |                  |         |                       |               |                                                                 |                                                                                                                                                                                                          |              | 0.56/d                     | 0.90 (0.87, 0.93) |                                                                                                                                                                                                                                                                                                  |                  |
|                          |                   |                  |         |                       |               |                                                                 |                                                                                                                                                                                                          |              | 0.76/d                     | 0.89 (0.87, 0.92) |                                                                                                                                                                                                                                                                                                  |                  |
|                          |                   |                  |         |                       |               |                                                                 |                                                                                                                                                                                                          |              | Per 1 egg/wk               | 0.97 (0.96, 0.98) |                                                                                                                                                                                                                                                                                                  |                  |
|                          |                   |                  |         |                       |               |                                                                 |                                                                                                                                                                                                          |              | CHD (30,169)               |                   |                                                                                                                                                                                                                                                                                                  | 1.00 (reference) |
|                          |                   |                  |         |                       |               |                                                                 |                                                                                                                                                                                                          |              | 0.29/d                     | 0.95 (0.91, 0.99) |                                                                                                                                                                                                                                                                                                  |                  |
|                          |                   |                  |         |                       |               |                                                                 |                                                                                                                                                                                                          |              | 0.36/d                     | 0.92 (0.88, 0.96) |                                                                                                                                                                                                                                                                                                  |                  |
|                          |                   |                  |         |                       |               |                                                                 |                                                                                                                                                                                                          |              | 0.46/d                     | 0.86 (0.81, 0.91) |                                                                                                                                                                                                                                                                                                  |                  |
|                          |                   |                  |         |                       |               |                                                                 |                                                                                                                                                                                                          |              | 0.56/d                     | 0.88 (0.84, 0.93) |                                                                                                                                                                                                                                                                                                  |                  |
|                          |                   |                  |         |                       |               |                                                                 |                                                                                                                                                                                                          |              | 0.76/d                     | 0.88 (0.84, 0.93) |                                                                                                                                                                                                                                                                                                  |                  |
|                          |                   |                  |         |                       |               |                                                                 |                                                                                                                                                                                                          |              | Per 1 egg/wk               | 0.97 (0.95, 0.98) |                                                                                                                                                                                                                                                                                                  |                  |
|                          |                   |                  |         |                       |               |                                                                 |                                                                                                                                                                                                          |              | Hemorrhagic stroke (7,078) |                   |                                                                                                                                                                                                                                                                                                  | 1.00 (reference) |
|                          |                   |                  |         |                       |               |                                                                 |                                                                                                                                                                                                          |              | 0.29/d                     | 0.86 (0.79, 0.93) |                                                                                                                                                                                                                                                                                                  |                  |
|                          |                   |                  |         |                       |               |                                                                 |                                                                                                                                                                                                          |              | 0.36/d                     | 0.82 (0.76, 0.88) |                                                                                                                                                                                                                                                                                                  |                  |
|                          |                   |                  |         |                       |               |                                                                 |                                                                                                                                                                                                          |              | 0.46/d                     | 0.77 (0.70, 0.86) |                                                                                                                                                                                                                                                                                                  |                  |
|                          |                   |                  |         |                       |               |                                                                 |                                                                                                                                                                                                          |              | 0.56/d                     | 0.74 (0.67, 0.82) |                                                                                                                                                                                                                                                                                                  |                  |
|                          |                   |                  |         |                       |               |                                                                 |                                                                                                                                                                                                          |              | 0.76/d                     | 0.74 (0.67, 0.82) |                                                                                                                                                                                                                                                                                                  |                  |
|                          |                   |                  |         |                       |               |                                                                 |                                                                                                                                                                                                          |              | Per 1 egg/wk               | 0.92(0.90, 0.95)  |                                                                                                                                                                                                                                                                                                  |                  |
| Ischemic stroke (27,745) |                   | 1.00 (reference) |         |                       |               |                                                                 |                                                                                                                                                                                                          |              |                            |                   |                                                                                                                                                                                                                                                                                                  |                  |
| 0.29/d                   | 0.98 (0.94, 1.03) |                  |         |                       |               |                                                                 |                                                                                                                                                                                                          |              |                            |                   |                                                                                                                                                                                                                                                                                                  |                  |
| 0.36/d                   | 0.95 (0.91, 1.00) |                  |         |                       |               |                                                                 |                                                                                                                                                                                                          |              |                            |                   |                                                                                                                                                                                                                                                                                                  |                  |
| 0.46/d                   | 0.95 (0.90, 1.00) |                  |         |                       |               |                                                                 |                                                                                                                                                                                                          |              |                            |                   |                                                                                                                                                                                                                                                                                                  |                  |
| 0.56/d                   | 0.90 (0.85, 0.95) |                  |         |                       |               |                                                                 |                                                                                                                                                                                                          |              |                            |                   |                                                                                                                                                                                                                                                                                                  |                  |
| 0.76/d                   | 0.97 (0.96, 0.98) |                  |         |                       |               |                                                                 |                                                                                                                                                                                                          |              |                            |                   |                                                                                                                                                                                                                                                                                                  |                  |
| Per 1 egg/wk             | 0.97 (0.96, 0.98) |                  |         |                       |               |                                                                 |                                                                                                                                                                                                          |              |                            |                   |                                                                                                                                                                                                                                                                                                  |                  |

|                          |                 |               |       |                                     |                            |                                                            |                                                                                                                    |                       |                                        |                  |                                                                                                                                                                                            |
|--------------------------|-----------------|---------------|-------|-------------------------------------|----------------------------|------------------------------------------------------------|--------------------------------------------------------------------------------------------------------------------|-----------------------|----------------------------------------|------------------|--------------------------------------------------------------------------------------------------------------------------------------------------------------------------------------------|
| Qureshi et al.<br>2007   | NHANES-I        | United States | 20    | 9,734 men and women                 | 25-74 y                    | Self-administered nutritional questionnaire, baseline only | Confirmed by medical records or death certificate                                                                  | Stroke (655)          | <1/wk                                  | 1.00 (reference) | Age, sex, race/ethnicity, systolic blood pressure, diabetes, serum cholesterol, smoking, BMI and education                                                                                 |
|                          |                 |               |       |                                     |                            |                                                            |                                                                                                                    |                       | 1-6/wk                                 | 0.90(0.70, 1.00) |                                                                                                                                                                                            |
|                          |                 |               |       |                                     |                            |                                                            |                                                                                                                    |                       | >6/wk                                  | 0.90(0.70, 1.10) |                                                                                                                                                                                            |
|                          |                 |               |       |                                     |                            |                                                            |                                                                                                                    | Ischemic stroke (591) | <1/wk                                  | 1.00 (reference) |                                                                                                                                                                                            |
|                          |                 |               |       |                                     |                            |                                                            |                                                                                                                    |                       | 1-6/wk                                 | 0.80(0.70, 1.00) |                                                                                                                                                                                            |
|                          |                 |               |       |                                     |                            |                                                            |                                                                                                                    |                       | >6/wk                                  | 0.90(0.70, 1.10) |                                                                                                                                                                                            |
|                          |                 |               |       |                                     |                            |                                                            |                                                                                                                    | CHD (1,584)           | <1/wk                                  | 1.00 (reference) |                                                                                                                                                                                            |
|                          |                 |               |       |                                     |                            |                                                            |                                                                                                                    |                       | 1-6/wk                                 | 1.00(0.90, 1.10) |                                                                                                                                                                                            |
|                          |                 |               |       |                                     |                            |                                                            |                                                                                                                    |                       | >6/wk                                  | 1.10(0.90,1.30)  |                                                                                                                                                                                            |
| Ruggiero et al.<br>2021  | Moli-sani Study | Italy         | 8.3   | 20,562 men and women                | ≥35 y                      | Interviewer-administered FFQ, Baseline only                | Assessed by the Italian mortality registry (ReNCaM registry), validated by Italian death certificates (ISTAT form) | CVD death (271)       | 0.63(0.39-0.85)/wk                     | 1.00 (reference) | Age, sex, energy intake, educational level, household income, residence, smoking, BMI, leisure-time PA, baseline diabetes, hypertension, hyperlipidaemia and the Mediterranean diet score. |
|                          |                 |               |       |                                     |                            |                                                            |                                                                                                                    | 1.47(1.23-1.64)/wk    | 1.29(0.94, 1.77)                       |                  |                                                                                                                                                                                            |
|                          |                 |               |       |                                     |                            |                                                            |                                                                                                                    | 2.55(2.20-3.07)/wk    | 1.43(1.03, 1.97)                       |                  |                                                                                                                                                                                            |
|                          |                 |               |       |                                     |                            |                                                            |                                                                                                                    | 4.60(4.19-5.26)/wk    | 1.75(1.07, 2.87)                       |                  |                                                                                                                                                                                            |
| Sauvaget et al.<br>2003  | Life Span Study | Japan         | 16    | 37,130 men and women                | 34-103 y                   | Self-administered FFQ baseline only                        | Confirmed by the nationwide family registration system of Japan                                                    | Stroke death (1,462)  | Never                                  | 1.00 (reference) | Sex, birth cohort, and adjusted for city, radiation dose, self-reported body mass index, smoking status, alcohol habits, education level and history of diabetes, or hypertension.         |
|                          |                 |               |       |                                     |                            |                                                            |                                                                                                                    | <1 time/week          | 0.75(0.55, 1.01)                       |                  |                                                                                                                                                                                            |
|                          |                 |               |       |                                     |                            |                                                            |                                                                                                                    | 2-4 time/week         | 0.77(0.57, 1.03)                       |                  |                                                                                                                                                                                            |
|                          |                 |               |       |                                     |                            |                                                            |                                                                                                                    | Almost daily          | 0.70(0.51, 0.95)                       |                  |                                                                                                                                                                                            |
| Scrafford et al.<br>2011 | NHANES III      | United States | 8.8   | 6,833 men                           | >17 y                      | Self-administered FFQ baseline only                        | Linking death records from National Death Index                                                                    | CHD death (198)       | 0.27/wk                                | 1.00 (reference) | Age, energy, marital status, education status, race-ethnicity, BMI, diabetes, hypertension, and alcohol intake                                                                             |
|                          |                 |               |       |                                     |                            |                                                            |                                                                                                                    |                       | 1.93/wk                                | 1.26(0.79, 2.00) |                                                                                                                                                                                            |
|                          |                 |               |       |                                     |                            |                                                            |                                                                                                                    |                       | 7.54/wk                                | 1.13(0.61, 2.11) |                                                                                                                                                                                            |
|                          |                 |               |       |                                     |                            |                                                            |                                                                                                                    | Stroke death (63)     | 0.27/wk                                | 1.00 (reference) |                                                                                                                                                                                            |
|                          |                 |               |       |                                     |                            |                                                            |                                                                                                                    |                       | 1.93/wk                                | 1.00(0.49, 2.02) |                                                                                                                                                                                            |
|                          |                 |               |       |                                     |                            |                                                            |                                                                                                                    |                       | 7.54/wk                                | 0.27(0.10, 0.73) |                                                                                                                                                                                            |
|                          | 8.9             | 8,113 women   | >17 y | Self-administered FFQ baseline only | Linking death records from | CHD death (168)                                            | 0.24/wk                                                                                                            | 1.00 (reference)      | Age, energy, marital status, education |                  |                                                                                                                                                                                            |

|                  |      |                                                                                     |      |                               |         |                                      |                                                                                                                                                                                                                                                                     |                   |                   |                  |                                                                                                                                                                                                                                                                                                                                                                                                                                                            |
|------------------|------|-------------------------------------------------------------------------------------|------|-------------------------------|---------|--------------------------------------|---------------------------------------------------------------------------------------------------------------------------------------------------------------------------------------------------------------------------------------------------------------------|-------------------|-------------------|------------------|------------------------------------------------------------------------------------------------------------------------------------------------------------------------------------------------------------------------------------------------------------------------------------------------------------------------------------------------------------------------------------------------------------------------------------------------------------|
|                  |      |                                                                                     |      |                               |         |                                      | National Death Index                                                                                                                                                                                                                                                |                   | 1.79/wk           | 1.12(0.66, 1.89) | status, race-ethnicity, BMI, diabetes, hypertension, and alcohol intake                                                                                                                                                                                                                                                                                                                                                                                    |
|                  |      |                                                                                     |      |                               |         |                                      |                                                                                                                                                                                                                                                                     | 7.41/wk           | 0.92(0.27, 3.11)  |                  |                                                                                                                                                                                                                                                                                                                                                                                                                                                            |
|                  |      |                                                                                     |      |                               |         |                                      | Stroke death (74)                                                                                                                                                                                                                                                   | 0.24/wk           | 1.00 (reference)  |                  |                                                                                                                                                                                                                                                                                                                                                                                                                                                            |
|                  |      |                                                                                     |      |                               |         |                                      |                                                                                                                                                                                                                                                                     | 1.79/wk           | 0.93(0.46, 1.90)  |                  |                                                                                                                                                                                                                                                                                                                                                                                                                                                            |
|                  |      |                                                                                     |      |                               |         |                                      |                                                                                                                                                                                                                                                                     | 7.41/wk           | 1.03(0.25, 4.22)  |                  |                                                                                                                                                                                                                                                                                                                                                                                                                                                            |
| Sun et al. 2021  | WHI  | United States                                                                       | 18.1 | 10,251 women                  | 50-79 y | Self-administered FFQ, baseline only | Death certificates, medical records, autopsy reports, or by linkage to the National Death Index.                                                                                                                                                                    | CVD death (6,993) | 0.03oz/d          | 1.00 (reference) | Age at baseline, race/ethnicity, education, income, OS/CT, unopposed estrogen use, estrogen + progesterone use, smoking status, physical activity, alcohol intake, total energy intake, baseline diabetes status, baseline high blood cholesterol status, family history of heart attack/stroke, whole grain consumption, vegetable consumption, fruit consumption, sugar-sweetened beverage consumption, and mutual adjustment for other protein sources. |
|                  |      |                                                                                     |      |                               |         |                                      |                                                                                                                                                                                                                                                                     | 0.1oz/d           | 1.05(0.96, 1.12)  |                  |                                                                                                                                                                                                                                                                                                                                                                                                                                                            |
|                  |      |                                                                                     |      |                               |         |                                      |                                                                                                                                                                                                                                                                     | 0.2oz/d           | 1.008(0.99, 1.12) |                  |                                                                                                                                                                                                                                                                                                                                                                                                                                                            |
|                  |      |                                                                                     |      |                               |         |                                      |                                                                                                                                                                                                                                                                     | 0.3oz/d           | 1.13(1.03, 1.20)  |                  |                                                                                                                                                                                                                                                                                                                                                                                                                                                            |
|                  |      |                                                                                     |      |                               |         |                                      |                                                                                                                                                                                                                                                                     | 0.7oz/d           | 1.24(1.14, 1.34)  |                  |                                                                                                                                                                                                                                                                                                                                                                                                                                                            |
|                  |      |                                                                                     |      |                               |         |                                      |                                                                                                                                                                                                                                                                     | per 1oz/d         | 1.21(1.14, 1.28)  |                  |                                                                                                                                                                                                                                                                                                                                                                                                                                                            |
| Tong et al. 2020 | EPIC | Denmark, Germany, Greece, Italy, the Netherlands, Norway, Spain, Sweden, and the UK | 12.7 | 140,117 men and 278,212 women | ≥55 y   | FFQ, baseline only                   | Record linkage to morbidity or hospital registries, and self-reports followed by confirmation with medical records; vital status collected from mortality registries at the regional or national level or by active follow-up of study participants and next of kin | Stroke (6,748)    | 3g/d              | 1.00 (reference) | Age, smoking status and number of cigarettes per day, history of diabetes, prior hypertension, prior hyperlipidemia, Cambridge physical activity index, employment status, level of education completed, current alcohol consumption, BMI, observed intake of energy, stratified by sex and EPIC center.                                                                                                                                                   |
|                  |      |                                                                                     |      |                               |         |                                      |                                                                                                                                                                                                                                                                     | 7.8g/d            | 0.95(0.87, 1.03)  |                  |                                                                                                                                                                                                                                                                                                                                                                                                                                                            |
|                  |      |                                                                                     |      |                               |         |                                      |                                                                                                                                                                                                                                                                     | 13.7g/d           | 0.94(0.87, 1.02)  |                  |                                                                                                                                                                                                                                                                                                                                                                                                                                                            |
|                  |      |                                                                                     |      |                               |         |                                      |                                                                                                                                                                                                                                                                     | 21.5g/d           | 0.98(0.90, 1.06)  |                  |                                                                                                                                                                                                                                                                                                                                                                                                                                                            |
|                  |      |                                                                                     |      |                               |         |                                      |                                                                                                                                                                                                                                                                     | 35.6g/d           | 1.04(0.96, 1.12)  |                  |                                                                                                                                                                                                                                                                                                                                                                                                                                                            |
|                  |      |                                                                                     |      |                               |         |                                      |                                                                                                                                                                                                                                                                     | per unit 20g/d    | 1.04(1.01, 1.07)  |                  |                                                                                                                                                                                                                                                                                                                                                                                                                                                            |

|                            |                                                  |             |      |                       |         |                                            |                                                                                     |                    |                   |                   |                                                                                                                                                                                                                                                                                                                                                                         |
|----------------------------|--------------------------------------------------|-------------|------|-----------------------|---------|--------------------------------------------|-------------------------------------------------------------------------------------|--------------------|-------------------|-------------------|-------------------------------------------------------------------------------------------------------------------------------------------------------------------------------------------------------------------------------------------------------------------------------------------------------------------------------------------------------------------------|
| Trichopoulou et al. 2006   | EPIC-Greece                                      | Greece      | 4.5  | 1,013 men and women   |         | Interviewer-administered FFQ baseline only | Based on death certificate information.                                             |                    |                   |                   | Gender, age, educational level, smoking, waist-to-height, hip circumference, MET score, treatment with insulin, treatment for hypertension at enrolment and treatment for hypercholesterolaemia at enrolment, and other indicated food groups.                                                                                                                          |
|                            |                                                  |             |      |                       |         |                                            |                                                                                     | CVD Death (46)     | Per 10g/d         | 1.54 (1.20, 1.97) |                                                                                                                                                                                                                                                                                                                                                                         |
| van den Brandt et al. 2019 | NLCS                                             | Netherlands | 10   | 120,852 men and women | 55-69 y | Self-administered FFQ baseline only        | Death certificates linkage to statistics Netherlands                                | CVD Death (2,985)  | 0 g/day           | 1.00 (reference)  | Age at baseline, sex, cigarette smoking status, number of cigarettes smoked per day, and years of smoking, history of physician-diagnosed hypertension and diabetes, body height, BMI, non-occupational physical activity, highest level of education, intake of alcohol, vegetables and fruit, energy, use of nutritional supplements, and postmenopausal HRT (women). |
|                            |                                                  |             |      |                       |         |                                            |                                                                                     |                    | 7.1 g/day         | 0.89 (0.69, 1.16) |                                                                                                                                                                                                                                                                                                                                                                         |
|                            |                                                  |             |      |                       |         |                                            |                                                                                     |                    | 14.2 g/day        | 0.90 (0.70, 1.16) |                                                                                                                                                                                                                                                                                                                                                                         |
|                            |                                                  |             |      |                       |         |                                            |                                                                                     |                    | 21.4 g/day        | 0.92 (0.71, 1.19) |                                                                                                                                                                                                                                                                                                                                                                         |
|                            |                                                  |             |      |                       |         |                                            |                                                                                     |                    | Per 50g/day       | 0.92 (0.70, 1.20) |                                                                                                                                                                                                                                                                                                                                                                         |
| Virtanen et al. 2016       | Kuopio Ischaemic Heart Disease Risk Factor Study | Finland     | 20.8 | 1,032 men             | 42-60 y | Guided 4-day food records, baseline only   | Computer linkage to the national hospital discharge and death certificate registers | CHD (230)          | 11 g/d            | 1.00 (reference)  | Age, examination year, energy intake, smoking, BMI, diabetes, hypertension, leisure-time physical activity, coronary artery disease history in close relatives, education, and intakes of alcohol, fruits, berries, vegetables, fiber, polyunsaturated fatty acids, and saturated fatty acids.                                                                          |
|                            |                                                  |             |      |                       |         |                                            |                                                                                     |                    | 26 g/d            | 0.96 (0.69, 1.34) |                                                                                                                                                                                                                                                                                                                                                                         |
|                            |                                                  |             |      |                       |         |                                            |                                                                                     |                    | 52 g/d            | 1.18 (0.85, 1.66) |                                                                                                                                                                                                                                                                                                                                                                         |
| Wang et al. 2016           | Linxian NIT                                      | China       | 26   | 2,445 men and women   | 40-69 y | Interviewer administered FFQ baseline only | Doctor visits/ Hospital records reviews/ National registry                          | CHD death (355)    | Per 4 times/month | 1.00 (0.95, 1.06) | Age, sex, commune, smoking, drinking, season and BMI                                                                                                                                                                                                                                                                                                                    |
|                            |                                                  |             |      |                       |         |                                            |                                                                                     | Stroke death (452) | Per 4 times/month | 1.00 (0.96, 1.06) |                                                                                                                                                                                                                                                                                                                                                                         |

|                 |                                |               |     |                             |                                                        |                                                                             |                                                                                                                            |                 |                                           |                                                                                                  |                                                                                                                                                                                                                                                      |
|-----------------|--------------------------------|---------------|-----|-----------------------------|--------------------------------------------------------|-----------------------------------------------------------------------------|----------------------------------------------------------------------------------------------------------------------------|-----------------|-------------------------------------------|--------------------------------------------------------------------------------------------------|------------------------------------------------------------------------------------------------------------------------------------------------------------------------------------------------------------------------------------------------------|
| Xia et al. 2020 | NHANES                         | United States | 7.8 | 18,634 men and 18,487 women | ≥20 y                                                  | Assessed via 24-hour dietary recalls by trained interviewers, baseline only | Ascertained by probabilistic matching with the National Death Index                                                        | CVD death (870) | <0.5/d<br>0.5-1/d<br>>1/d                 | 1.00 (reference)<br>0.97(0.81, 1.17)<br>0.89(0.64, 1.23)                                         | Age, sex, race/ethnicity, education, family income poverty ratio, marital status, NHANES cycles, total energy intake, cigarette smoking, alcohol drinking, physical activity, BMI, hypertension, diabetes, hypercholesterolemia, CVD, and cancer.    |
| Xia et al. 2020 | China-MUCA, InterAISA, CIMIC   | China         | 7.6 | 102,136 men and women       | China-MUCA: 35-59 y; InterAISA: 35-74 y; CIMIC: ≥ 18 y | Interviewer administered FFQ, repeated during the follow-up                 | recorded by well-trained local investigators and further adjudicated by the outcome assessment committee at Fuwai Hospital | CVD (4,848)     | <1/w<br>1~3/w<br>3~6/w<br>6-10/w<br>>10/w | 1.22(1.11, 1.35)<br>1.09(1.00, 1.19)<br>1.00 (reference)<br>1.25(1.14, 1.38)<br>1.39(1.28, 1.52) | Age, gender, urban or rural resident, per-capita household income, education attainment, tobacco smoking, alcohol consumption, family history of CVD, physical activity, BMI and dietary factors (red meat intake, fresh fruit and vegetable intake) |
|                 |                                |               |     |                             |                                                        |                                                                             |                                                                                                                            | CHD (1,273)     | <1/w<br>1~3/w<br>3~6/w<br>6-10/w<br>>10/w | 1.07(0.88, 1.32)<br>1.01(0.85, 1.21)<br>1.00 (reference)<br>1.34(1.12, 1.61)<br>1.86(1.57, 2.22) |                                                                                                                                                                                                                                                      |
|                 |                                |               |     |                             |                                                        |                                                                             |                                                                                                                            | Stroke (2,919)  | <1/w<br>1~3/w<br>3~6/w<br>6-10/w<br>>10/w | 1.27(1.12, 1.44)<br>1.13(1.01, 1.26)<br>1.00 (reference)<br>1.21(1.07, 1.36)<br>1.18(1.05, 1.33) |                                                                                                                                                                                                                                                      |
|                 |                                |               |     |                             |                                                        |                                                                             |                                                                                                                            |                 |                                           |                                                                                                  |                                                                                                                                                                                                                                                      |
|                 |                                |               |     |                             |                                                        |                                                                             |                                                                                                                            |                 |                                           |                                                                                                  |                                                                                                                                                                                                                                                      |
| Xu et al. 2018  | Guangzhou Biobank Cohort Study | China         | 9.8 | 28,024 men and women        | ≥50 y                                                  | FFQ baseline only                                                           | Obtained via record linkage with the Guangzhou Center for Disease Control                                                  | CVD death (873) | <1/week<br>1-2/week<br>3-4/week           | 1.00 (reference)<br>0.92 (0.77, 1.10)<br>0.96 (0.80, 1.14)                                       | Sex, age, education, occupation, family income, smoking status, physical activity, alcohol drinking, self-rated                                                                                                                                      |



|                           |                                                                                                              |       |      |                                  |         |                                                      |                                                                      |                    |                                                                                                                                                                                                                                                                                                                                         |                                                                                                                                                                                                                           |
|---------------------------|--------------------------------------------------------------------------------------------------------------|-------|------|----------------------------------|---------|------------------------------------------------------|----------------------------------------------------------------------|--------------------|-----------------------------------------------------------------------------------------------------------------------------------------------------------------------------------------------------------------------------------------------------------------------------------------------------------------------------------------|---------------------------------------------------------------------------------------------------------------------------------------------------------------------------------------------------------------------------|
|                           |                                                                                                              |       |      |                                  |         | and Prevention<br>(GCDC)                             |                                                                      | 5-6/week           | 0.81 (0.58,<br>1.14)                                                                                                                                                                                                                                                                                                                    | health and chronic<br>disease history<br>(diabetes,<br>hypertension and<br>dyslipidemia).                                                                                                                                 |
|                           |                                                                                                              |       |      |                                  |         |                                                      |                                                                      | >7/week            | 0.99 (0.76,<br>1.27)                                                                                                                                                                                                                                                                                                                    |                                                                                                                                                                                                                           |
|                           |                                                                                                              |       |      |                                  |         | CHD death<br>(388)                                   |                                                                      | <1/week            | 1.00<br>(reference)                                                                                                                                                                                                                                                                                                                     |                                                                                                                                                                                                                           |
|                           |                                                                                                              |       |      |                                  |         |                                                      |                                                                      | 1-2/week           | 0.86 (0.66,<br>1.13)                                                                                                                                                                                                                                                                                                                    |                                                                                                                                                                                                                           |
|                           |                                                                                                              |       |      |                                  |         |                                                      |                                                                      | 3-4/week           | 1.03 (0.79,<br>1.34)                                                                                                                                                                                                                                                                                                                    |                                                                                                                                                                                                                           |
|                           |                                                                                                              |       |      |                                  |         |                                                      |                                                                      | 5-6/week           | 0.75 (0.44,<br>1.27)                                                                                                                                                                                                                                                                                                                    |                                                                                                                                                                                                                           |
|                           |                                                                                                              |       |      |                                  |         |                                                      |                                                                      | >7/week            | 0.92 (0.63,<br>1.36)                                                                                                                                                                                                                                                                                                                    |                                                                                                                                                                                                                           |
|                           |                                                                                                              |       |      |                                  |         | Stroke death<br>(341)                                |                                                                      | <1/week            | 1.00<br>(reference)                                                                                                                                                                                                                                                                                                                     |                                                                                                                                                                                                                           |
|                           |                                                                                                              |       |      |                                  |         |                                                      |                                                                      | 1-2/week           | 0.99 (0.75,<br>1.30)                                                                                                                                                                                                                                                                                                                    |                                                                                                                                                                                                                           |
|                           |                                                                                                              |       |      |                                  |         |                                                      |                                                                      | 3-4/week           | 0.90 (0.68,<br>1.20)                                                                                                                                                                                                                                                                                                                    |                                                                                                                                                                                                                           |
|                           |                                                                                                              |       |      |                                  |         |                                                      |                                                                      | 5-6/week           | 0.81 (0.47,<br>1.38)                                                                                                                                                                                                                                                                                                                    |                                                                                                                                                                                                                           |
|                           |                                                                                                              |       |      |                                  |         |                                                      |                                                                      | >7/week            | 0.88 (0.57,<br>1.35)                                                                                                                                                                                                                                                                                                                    |                                                                                                                                                                                                                           |
| Zamora-Ros et al.<br>2019 | EPIC-Spain study (The<br>European Prospective<br>Investigation into Cancer<br>and Nutrition-Spain<br>cohort) | Spain | 18.4 | 15,323 men<br>and 25298<br>women | 29-69 y | Interviewer-<br>administered FFQ<br>baseline only    | Based on death<br>certificate<br>information.                        | CVD death<br>(761) | <10.8 g/d<br>(women)<br>1.00<br>(reference)<br><14.4 g/d<br>(men)<br>10.8-19.9<br>g/d (women)<br>1.11(0.91,<br>1.34)<br>14.4-26.8<br>g/d (men)<br>20.0-30.4<br>g/d (women)<br>1.10(0.90,<br>1.34)<br>26.9-42.6<br>g/d (men)<br>>30.4 g/d<br>(women)<br>1.07(0.86,<br>1.32)<br>>42.6 g/d<br>(men)<br>Per 1 egg/wk<br>1.00(0.98,<br>1.03) | Center, age at<br>recruitment in 5 years<br>categories, sex,<br>smoking intensity,<br>BMI, lifetime alcohol<br>intake, education<br>level, physical<br>activity, energy<br>intake, and adherence<br>to Mediterranean diet |
| Zazpe et al. 2011         | The SUN Project                                                                                              | Spain | 5.8  | 14,185 men<br>and women          | 20-90 y | Self-administered<br>questionnaire,<br>baseline only | Self-reported<br>questionnaire<br>and confirmed by<br>medical record | CVD (91)           | <1/wk<br>1.00<br>(reference)<br>1/wk<br>0.78 (0.36,<br>1.70)<br>2-4/wk<br>1.00 (0.51,<br>1.97)<br>>4/wk<br>1.10 (0.46,<br>2.63)                                                                                                                                                                                                         | Age, sex, total energy<br>intake, adherence to<br>the Mediterranean<br>food pattern, alcohol<br>intake, BMI, smoking<br>status, physical<br>activity, family<br>history of CVD,<br>diabetes.                              |

| Author                       | Study                                                                            | Country       | Age (y)           | N                     | Sex         | FFQ                 | Exposure                                                                                         | Outcome            | Relative Risk (95% CI) | Adjustment        |                                                                                                                                                                                                                                                                                                                                                                            |
|------------------------------|----------------------------------------------------------------------------------|---------------|-------------------|-----------------------|-------------|---------------------|--------------------------------------------------------------------------------------------------|--------------------|------------------------|-------------------|----------------------------------------------------------------------------------------------------------------------------------------------------------------------------------------------------------------------------------------------------------------------------------------------------------------------------------------------------------------------------|
| Zhong et al. 2019            | The Lifetime Risk Pooling Project, 6 cohorts (ARIC, CARDIA, FHS, FOS, JHS, MESA) | United States | 17.5              | 29,615 men and women  | 51.6±13.5 y | FFQs, baseline only | Adjudicated cause of death by review of medical records and/or autopsies by study investigators  | CVD (5,400)        | 0/d                    | 1.00 (reference)  | Age, sex, race/ethnicity, education, total energy, smoking status, smoking pack-years, cohort-specific physical activity z-score, alcohol consumption, and use of hormone replacement therapy, BMI, diabetes status, systolic blood pressure, use of antihypertensive medications, high density lipoprotein cholesterol, non-HDL-C, and use of lipid-lowering medications. |
|                              |                                                                                  |               |                   |                       |             |                     |                                                                                                  |                    | <0.5/d                 | 1.06 (0.98, 1.14) |                                                                                                                                                                                                                                                                                                                                                                            |
|                              |                                                                                  |               |                   |                       |             |                     |                                                                                                  |                    | 0.5-1/d                | 1.05 (0.92, 1.20) |                                                                                                                                                                                                                                                                                                                                                                            |
|                              |                                                                                  |               |                   |                       |             |                     |                                                                                                  |                    | 1-2/d                  | 1.17 (1.04, 1.31) |                                                                                                                                                                                                                                                                                                                                                                            |
|                              |                                                                                  |               |                   |                       |             |                     |                                                                                                  |                    | >2/d                   | 1.29 (1.04, 1.59) |                                                                                                                                                                                                                                                                                                                                                                            |
|                              | CHD (2,088)                                                                      | Per 0.5/d     | 1.07 (1.01, 1.12) |                       |             |                     |                                                                                                  |                    |                        |                   |                                                                                                                                                                                                                                                                                                                                                                            |
|                              | Stroke (1,302)                                                                   | Per 0.5/d     | 1.10 (1.03, 1.18) |                       |             |                     |                                                                                                  |                    |                        |                   |                                                                                                                                                                                                                                                                                                                                                                            |
| Zhuang et al 2021, CVD death | NIH-AARP                                                                         | United States | 16                | 521,120 men and women | 50-71 y     | FFQs, baseline only | Linkage to the National Death Index Plus maintained by the National Center for Health Statistics | CVD death (38,747) | 0.1±0.2g/d             | 1.00 (reference)  | Age, sex, BMI, race, high cholesterol level, heart disease, stroke, diabetes, cancer at baseline, total energy, egg whites/substitutes, dietary cholesterol, red meat, fish, poultry, dairy products, fruit, vegetables, potatoes, nuts/legumes, whole grains, refined grains, coffee, sugar-sweetened beverages and Healthy Eating Index-2015                             |
|                              |                                                                                  |               |                   |                       |             |                     |                                                                                                  |                    | 3±1.2g/d               | 1.01(0.97, 1.04)  |                                                                                                                                                                                                                                                                                                                                                                            |
|                              |                                                                                  |               |                   |                       |             |                     |                                                                                                  |                    | 7.6±1.5g/d             | 1.01(0.97, 1.05)  |                                                                                                                                                                                                                                                                                                                                                                            |
|                              |                                                                                  |               |                   |                       |             |                     |                                                                                                  |                    | 14±2.4g/d              | 1.07(1.03, 1.11)  |                                                                                                                                                                                                                                                                                                                                                                            |
|                              |                                                                                  |               |                   |                       |             |                     |                                                                                                  |                    | 34.7±19.8g/d           | 1.14(1.11, 1.18)  |                                                                                                                                                                                                                                                                                                                                                                            |

\* Cox proportional hazards regression models were used for relative risk estimates from all studies.

Abbreviations: BMI = body mass index; CHD = coronary heart disease; CVD = cardiovascular disease; FFQ = food frequency questionnaire; HDL = high-density lipoprotein cholesterol; HF = heart failure; LDL = low-density lipoprotein cholesterol; SD = standard deviation; SFFQ = semiquantitative food frequency questionnaire; TG = triglyceride

**Supplemental Table XVI.** Overview of the covariates adjusted in multivariable model among studies in the meta-analysis \*

| Covariates                                                   | Abdollahi et al. 2019 | Chen et al 2021 | Dehghan et al 2020 | Diez-Espino et al. 2017 | Djousse et al. 2008 | Djousse et al. 2008 | Djousse et al 2020 | Djousse et al.2021 | Drouin-Chartier et al. 2020 | Farvid et al. 2017 | Goldberg et al. 2014 | Guo et al. 2018 | Houston et al. 2011 | Jang et al. 2018 | Key et al. 2019 | Larsson et al. 2015 | Mann et al. 1997 | Misirli et al. 2012 | Nakamura et al. 2004 | Nakamura et al. 2006 | Nakamura et al. 2018 | Nettleton et al. 2008 | Pan et al 2021 | Qin et al. 2018 | Qureshi et al. 2007 | Ruggiero et al 2021 | Sauvaget et al. 2003 | Serafford et al. 2011 | Sun et al 2021 | Tong et al 2020 | Trichopoulou et al 2006 | van den Brandt et al. 2019 | Virtanen et al. 2016 | Wang et al. 2016 | Xia et al 2020 | Xia et al 2020 | Xu et al. 2018 | Yaemsiri et al. 2012 | Zamora-Ros et al 2019 | Zazpe et al. 2011 | Zhong et al. 2019 | Zhuang et al 2021 |   |   |   |   |   |   |   |
|--------------------------------------------------------------|-----------------------|-----------------|--------------------|-------------------------|---------------------|---------------------|--------------------|--------------------|-----------------------------|--------------------|----------------------|-----------------|---------------------|------------------|-----------------|---------------------|------------------|---------------------|----------------------|----------------------|----------------------|-----------------------|----------------|-----------------|---------------------|---------------------|----------------------|-----------------------|----------------|-----------------|-------------------------|----------------------------|----------------------|------------------|----------------|----------------|----------------|----------------------|-----------------------|-------------------|-------------------|-------------------|---|---|---|---|---|---|---|
| <b>Primary confounding factors</b>                           |                       |                 |                    |                         |                     |                     |                    |                    |                             |                    |                      |                 |                     |                  |                 |                     |                  |                     |                      |                      |                      |                       |                |                 |                     |                     |                      |                       |                |                 |                         |                            |                      |                  |                |                |                |                      |                       |                   |                   |                   |   |   |   |   |   |   |   |
| Age                                                          | ★                     | ★               | ★                  | ★                       | ★                   | ★                   | ★                  | ★                  | ★                           | ★                  | ★                    | ★               | ★                   | ★                | ★               | ★                   | ★                | ★                   | ★                    | ★                    | ★                    | ★                     | ★              | ★               | ★                   | ★                   | ★                    | ★                     | ★              | ★               | ★                       | ★                          | ★                    | ★                | ★              | ★              | ★              | ★                    | ★                     | ★                 | ★                 | ★                 | ★ | ★ |   |   |   |   |   |
| Sex                                                          | N<br>A                | N<br>A          | ★                  | ★                       | N<br>A              | N<br>A              | ★                  | ★                  | N<br>A                      | ★                  | ★                    | N<br>A          | ★                   | ★                | ★               | N<br>A              | ★                | ★                   | N<br>A               | ★                    | N<br>A               | ★                     | ★              | ★               | ★                   | ★                   | N<br>A               | N<br>A                | ★              | ★               | ★                       | ★                          | N<br>A               | ★                | ★              | ★              | ★              | ★                    | N<br>A                | ★                 | ★                 | ★                 | ★ | ★ | ★ |   |   |   |   |
| Body mass index                                              | ★                     |                 | ★                  | ★                       | ★                   | ★                   | ★                  | ★                  | ★                           | ★                  | ★                    | ★               | ★                   | ★                | ★               | ★                   |                  | ★                   | ★                    | ★                    | ★                    |                       | ★              | ★               | ★                   | ★                   | ★                    |                       | ★              | ★               | ★                       | ★                          | ★                    | ★                | ★              | ★              | ★              | ★                    | ★                     | ★                 | ★                 | ★                 | ★ | ★ | ★ |   |   |   |   |
| Smoking                                                      | ★                     | ★               | ★                  | ★                       | ★                   | ★                   | ★                  | ★                  | ★                           | ★                  | ★                    | ★               | ★                   | ★                | ★               | ★                   | ★                | ★                   | ★                    | ★                    | ★                    | ★                     | ★              | ★               | ★                   | ★                   | ★                    | ★                     | ★              | ★               | ★                       | ★                          | ★                    | ★                | ★              | ★              | ★              | ★                    | ★                     | ★                 | ★                 | ★                 | ★ | ★ | ★ | ★ |   |   |   |
| Physical activity                                            | ★                     | ★               | ★                  | ★                       | ★                   | ★                   | ★                  | ★                  | ★                           | ★                  | ★                    | ★               | ★                   | ★                | ★               | ★                   |                  | ★                   |                      |                      |                      | ★                     | ★              | ★               |                     | ★                   |                      |                       | ★              | ★               | ★                       | ★                          | ★                    | ★                | ★              | ★              | ★              | ★                    | ★                     | ★                 | ★                 | ★                 | ★ | ★ | ★ | ★ |   |   |   |
| Alcohol consumption                                          | ★                     | ★               |                    | ★                       | ★                   | ★                   | ★                  | ★                  | ★                           | ★                  | ★                    | ★               | ★                   | ★                | ★               | ★                   |                  |                     | ★                    | ★                    | ★                    | ★                     | ★              | ★               |                     | ★                   | ★                    | ★                     | ★              | ★               | ★                       | ★                          | ★                    | ★                | ★              | ★              | ★              | ★                    | ★                     | ★                 | ★                 | ★                 | ★ | ★ | ★ | ★ |   |   |   |
| Total energy intake                                          | ★                     | ★               | ★                  | ★                       |                     |                     |                    |                    | ★                           | ★                  | ★                    | ★               | ★                   | ★                | ★               | ★                   |                  | ★                   |                      |                      |                      | ★                     | ★              |                 | ★                   |                     | ★                    |                       | ★              | ★               | ★                       | ★                          | ★                    | ★                | ★              | ★              | ★              | ★                    | ★                     | ★                 | ★                 | ★                 | ★ | ★ | ★ | ★ | ★ |   |   |
| <b>Secondary confounding factors</b>                         |                       |                 |                    |                         |                     |                     |                    |                    |                             |                    |                      |                 |                     |                  |                 |                     |                  |                     |                      |                      |                      |                       |                |                 |                     |                     |                      |                       |                |                 |                         |                            |                      |                  |                |                |                |                      |                       |                   |                   |                   |   |   |   |   |   |   |   |
| Hypertension/ blood pressure / blood pressure lowering drugs | ★                     | ★               |                    | ★                       | ★                   | ★                   |                    | ★                  | ★                           | ★                  |                      | ★               | ★                   | ★                | ★               | ★                   |                  | ★                   | ★                    | ★                    | ★                    | ★                     | ★              | ★               | ★                   | ★                   | ★                    | ★                     |                | ★               | ★                       | ★                          | ★                    | ★                | ★              | ★              |                | ★                    | ★                     | ★                 |                   | ★                 | ★ | ★ | ★ | ★ | ★ |   |   |
| Dyslipidemia / lipid profile / lipid-lowering drugs          |                       | ★               |                    | ★                       | ★                   | ★                   |                    | ★                  |                             | ★                  |                      | ★               | ★                   | ★                | ★               | ★                   |                  | ★                   | ★                    | ★                    | ★                    | ★                     | ★              | ★               | ★                   | ★                   |                      | ★                     |                | ★               |                         | ★                          |                      | ★                |                | ★              |                | ★                    | ★                     |                   |                   |                   | ★ | ★ | ★ | ★ | ★ |   |   |
| Red meat / processed meat intake                             |                       | ★               | ★                  |                         |                     |                     |                    | ★                  |                             |                    | ★                    |                 | ★                   | ★                | ★               | ★                   |                  |                     |                      | ★                    | ★                    |                       |                |                 |                     |                     |                      |                       | ★              |                 |                         |                            |                      |                  |                |                |                |                      |                       |                   |                   |                   |   |   |   |   |   | ★ | ★ |







**Supplemental Table XVII.** Evaluation of risk of bias according to the Newcastle-Ottawa Scale \*

| Author, year                | Newcastle-Ottawa Scale |    |    |               |    |    |         |     |     | Total |
|-----------------------------|------------------------|----|----|---------------|----|----|---------|-----|-----|-------|
|                             | Selection              |    |    | Comparability |    |    | Outcome |     |     |       |
|                             | 1†                     | 2‡ | 3§ | 4             | 5¶ | 6# | 7**     | 8†† | 9‡‡ |       |
| Abdollahi et al. 2019       | ★                      | ★  | -  | ★             | ★  | -  | ★       | ★   | ★   | 7     |
| Chen et al 2021             | -                      | ★  | ★  | ★             | -  | ★  | ★       | ★   | ★   | 7     |
| Dehghan et al 2020          | -                      | ★  | ★  | ★             | -  | -  | ★       | -   | ★   | 5     |
| Diez-Espino et al. 2017     | -                      | ★  | ★  | ★             | ★  | ★  | ★       | -   | ★   | 7     |
| Djousse et al. 2008         | -                      | ★  | ★  | ★             | -  | -  | ★       | ★   | ★   | 6     |
| Djousse et al. 2008         | -                      | ★  | ★  | ★             | -  | -  | ★       | ★   | ★   | 6     |
| Djousse et al. 2020         | -                      | ★  | -  | ★             | ★  | -  | ★       | -   | ★   | 5     |
| Djousse et al. 2021         | ★                      | ★  | -  | -             | ★  | -  | ★       | ★   | ★   | 6     |
| Drouin-Chartier et al. 2020 | -                      | ★  | ★  | ★             | ★  | ★  | ★       | ★   | ★   | 8     |
| Farvid et al. 2017          | ★                      | ★  | -  | ★             | ★  | -  | -       | ★   | ★   | 6     |
| Goldberg et al. 2014        | ★                      | ★  | -  | ★             | ★  | ★  | ★       | ★   | ★   | 8     |
| Guo et al. 2018             | ★                      | ★  | ★  | ★             | ★  | -  | ★       | ★   | ★   | 8     |
| Houston et al. 2011         | ★                      | ★  | -  | ★             | ★  | -  | ★       | -   | ★   | 6     |
| Jang et al. 2018            | ★                      | ★  | ★  | ★             | ★  | ★  | ★       | -   | -   | 7     |
| Key et al. 2019             | ★                      | ★  | -  | ★             | ★  | ★  | ★       | ★   | ★   | 8     |
| Larsson et al. 2015         | ★                      | ★  | -  | ★             | ★  | ★  | ★       | ★   | ★   | 8     |
| Mann et al. 1997            | -                      | ★  | -  | ★             | -  | -  | ★       | ★   | ★   | 5     |
| Nakamura et al. 2004        | ★                      | ★  | -  | ★             | -  | -  | ★       | ★   | ★   | 6     |
| Nakamura et al. 2006        | ★                      | ★  | -  | ★             | -  | ★  | ★       | ★   | ★   | 7     |
| Nakamura et al. 2018        | ★                      | ★  | -  | ★             | -  | ★  | ★       | ★   | ★   | 7     |
| Nettleton et al. 2008       | ★                      | ★  | ★  | ★             | -  | -  | ★       | ★   | ★   | 7     |
| Pan et al 2021              | ★                      | ★  | -  | -             | ★  | -  | ★       | ★   | ★   | 6     |
| Qin et al. 2018             | ★                      | ★  | ★  | ★             | -  | -  | ★       | -   | ★   | 6     |
| Qureshi et al. 2007         | ★                      | ★  | -  | ★             | -  | -  | ★       | ★   | ★   | 6     |
| Ruggiero et al 2021         | ★                      | ★  | -  | ★             | -  | ★  | ★       | -   | ★   | 6     |
| Sauvaget et al. 2003        | ★                      | ★  | -  | ★             | -  | -  | ★       | ★   | ★   | 6     |
| Scrafford et al. 2011       | ★                      | ★  | -  | ★             | -  | -  | ★       | -   | ★   | 5     |
| Sun et al 2021              | -                      | ★  | -  | ★             | -  | -  | ★       | ★   | ★   | 5     |
| Tong et al 2020             | ★                      | ★  | -  | ★             | ★  | -  | ★       | ★   | ★   | 7     |
| Trichopoulou et al 2006     | ★                      | ★  | -  | ★             | -  | ★  | ★       | -   | ★   | 6     |
| van den Brandt et al. 2019  | ★                      | ★  | -  | ★             | ★  | -  | ★       | ★   | ★   | 7     |
| Virtanen et al. 2016        | ★                      | ★  | -  | ★             | ★  | -  | ★       | ★   | ★   | 7     |
| Wang et al. 2016            | -                      | ★  | -  | ★             | -  | -  | ★       | ★   | ★   | 5     |
| Xia et al 2020              | ★                      | ★  | -  | -             | ★  | -  | ★       | -   | ★   | 5     |
| Xia et al 2020              | ★                      | ★  | ★  | ★             | ★  | -  | ★       | -   | ★   | 8     |
| Xu et al. 2018              | ★                      | ★  | -  | ★             | -  | -  | ★       | -   | ★   | 5     |
| Zamora-Ros et al 2019       | ★                      | ★  | -  | -             | -  | -  | ★       | ★   | ★   | 5     |

|                      |   |   |   |   |   |   |   |   |   |   |
|----------------------|---|---|---|---|---|---|---|---|---|---|
| Zazpe et al. 2011    | - | ★ | - | ★ | ★ | - | ★ | - | ★ | 5 |
| Zhong et al. 2019    | ★ | ★ | - | ★ | ★ | - | ★ | ★ | - | 6 |
| Zhuang et al 2021    | ★ | ★ | - | - | - | - | ★ | ★ | ★ | 5 |
| Zhao et al (current) | ★ | ★ | - | ★ | ★ | - | ★ | ★ | ★ | 7 |

\*★ represents 1 point awarded.

† If the exposed cohort is a community-based population cohort;

‡ If the non-exposed cohort drawn from the same community as the exposed cohort;

§ Ascertainment of exposure: if diet data extracted at baseline and  $\geq 1$  time during follow-up period;

|| If participants with prevalent CVD (outcome of interest) at baseline were excluded;

¶ If models were adjustment for age, sex, BMI, smoking status, alcohol intake, and physical activity (as primary confounders);

# If models were adjustment for hypertension/blood pressure/blood pressure-lowering drugs, and dyslipidemia/lipid profiles/lipid-lowering drugs, and total energy intake, and intakes of red meat/processed meat (as secondary confounders);

Outcome:

\*\* If non-lethal cases were assessed by physician's diagnosis, and lethal cases assessed using death certificates;

†† If cohort follow-up  $\geq 10$  years;

‡‡ If lost to cohort follow-up  $< 20\%$ .



**Supplemental Table XVIII.** Subgroup meta-analysis using random effects models for the associations between cardiovascular disease risk and egg consumption

| Categories                | Number of risk estimates | Number of participants | Number of events | Pooled RR (95% CI) | I <sup>2</sup> (%) | <i>P</i> for interaction |
|---------------------------|--------------------------|------------------------|------------------|--------------------|--------------------|--------------------------|
| <b>Sex</b>                |                          |                        |                  |                    |                    |                          |
| Both                      | 32                       | 3,034,637              | 197,046          | 1.03 (0.98, 1.09)  | 83.8               | 0.47                     |
| Men                       | 9                        | 185,141                | 36,786           | 1.02 (0.95, 1.09)  | 59.5               |                          |
| Women                     | 8                        | 381,623                | 21,647           | 1.09 (0.98, 1.20)  | 75.2               |                          |
| <b>No of participants</b> |                          |                        |                  |                    |                    |                          |
| <10000                    | 17                       | 77,934                 | 5,674            | 1.08 (0.96, 1.21)  | 50.9               | 0.59                     |
| ≥10000                    | 32                       | 3,523,467              | 249,805          | 1.03 (0.99, 1.07)  | 85                 |                          |
| <b>Follow-up duration</b> |                          |                        |                  |                    |                    |                          |
| <10 years                 | 16                       | 1,031,897              | 116,375          | 1.04 (0.94, 1.14)  | 83.9               | 0.66                     |
| ≥10 years                 | 33                       | 2,569,504              | 139,104          | 1.04 (1.00, 1.09)  | 77.8               |                          |
| <b>No of events</b>       |                          |                        |                  |                    |                    |                          |
| <1000                     | 22                       | 229,073                | 7,551            | 1.05 (0.97, 1.15)  | 52.2               | 0.89                     |
| ≥1000                     | 27                       | 3,372,328              | 247,928          | 1.04 (1.00, 1.08)  | 86                 |                          |
| <b>Region</b>             |                          |                        |                  |                    |                    |                          |
| US                        | 20                       | 1,388,758              | 95,768           | 1.08 (1.02, 1.14)  | 81.2               | 0.02                     |
| Europe                    | 15                       | 1,145,055              | 46,469           | 1.05 (0.98, 1.14)  | 67.8               |                          |
| Asia                      | 12                       | 921,563                | 99,584           | 0.96 (0.87, 1.06)  | 85.3               |                          |
| <b>Risk of bias</b>       |                          |                        |                  |                    |                    |                          |
| Low (≥7)                  | 20                       | 1,596,439              | 76,452           | 1.04 (1.01, 1.08)  | 54.3               | 0.77                     |
| Moderate (≤6)             | 29                       | 2,00,4962              | 179,027          | 1.05 (0.98, 1.12)  | 85.8               |                          |
| <b>Dietary assessment</b> |                          |                        |                  |                    |                    |                          |
| Baseline only             | 36                       | 2,524,266              | 127,381          | 1.04 (1.00, 1.09)  | 77.7               | 0.69                     |
| Repeated measurements     | 13                       | 1,077,135              | 128,098          | 1.03 (0.96, 1.09)  | 84.8               |                          |

Abbreviations: CI = confidence interval; RR = relative risk

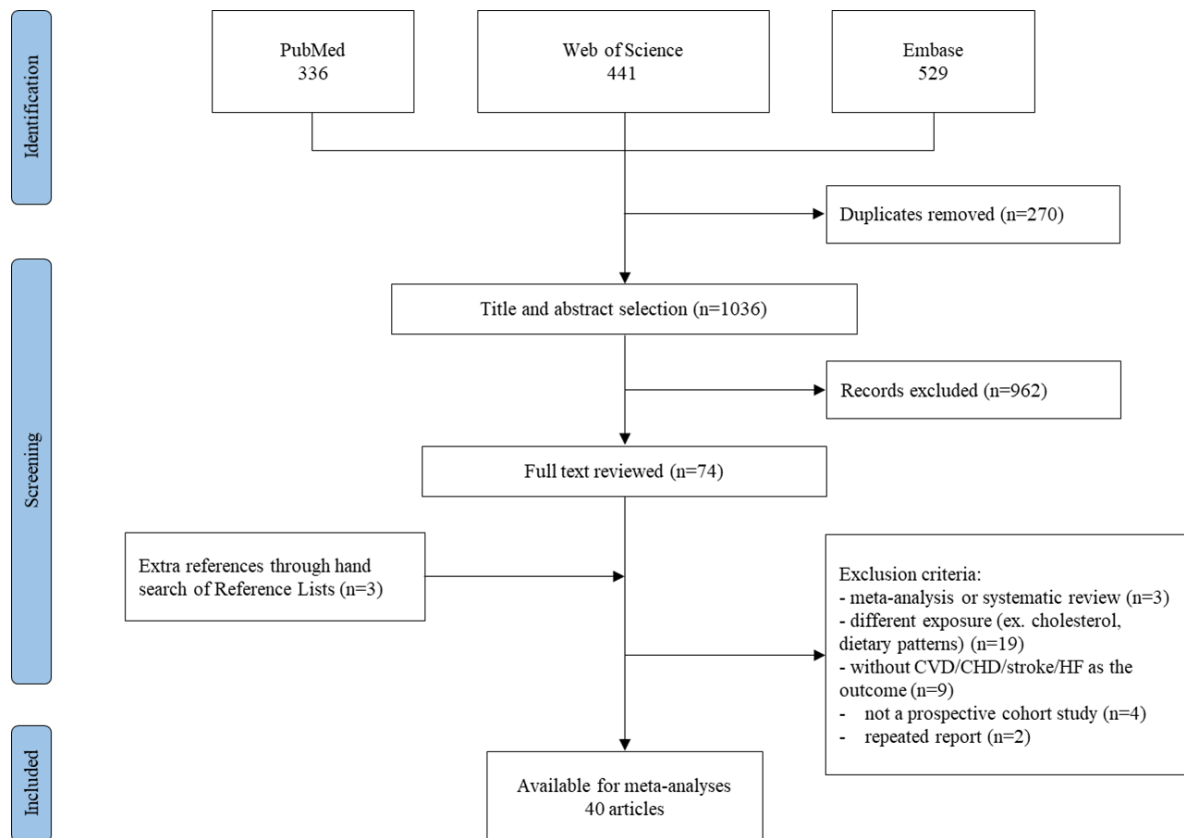

**Supplemental Figure I.** Flow chart for participated study selection in the meta-analysis

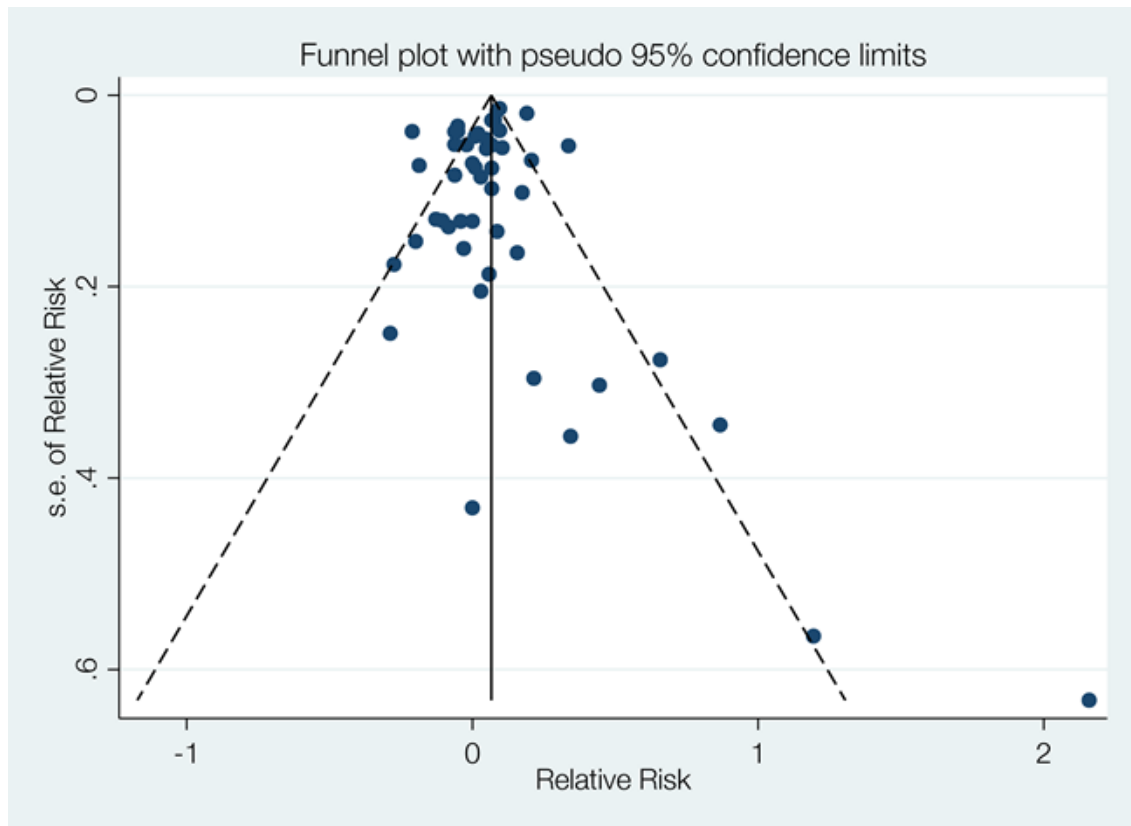

**Supplemental Figure II.** Funnel plot for evaluation of publication bias for the associations between egg consumption and risk of cardiovascular disease (including death from cardiovascular disease)

P value for Egger's test=0.35; P value for Begg's test =0.16

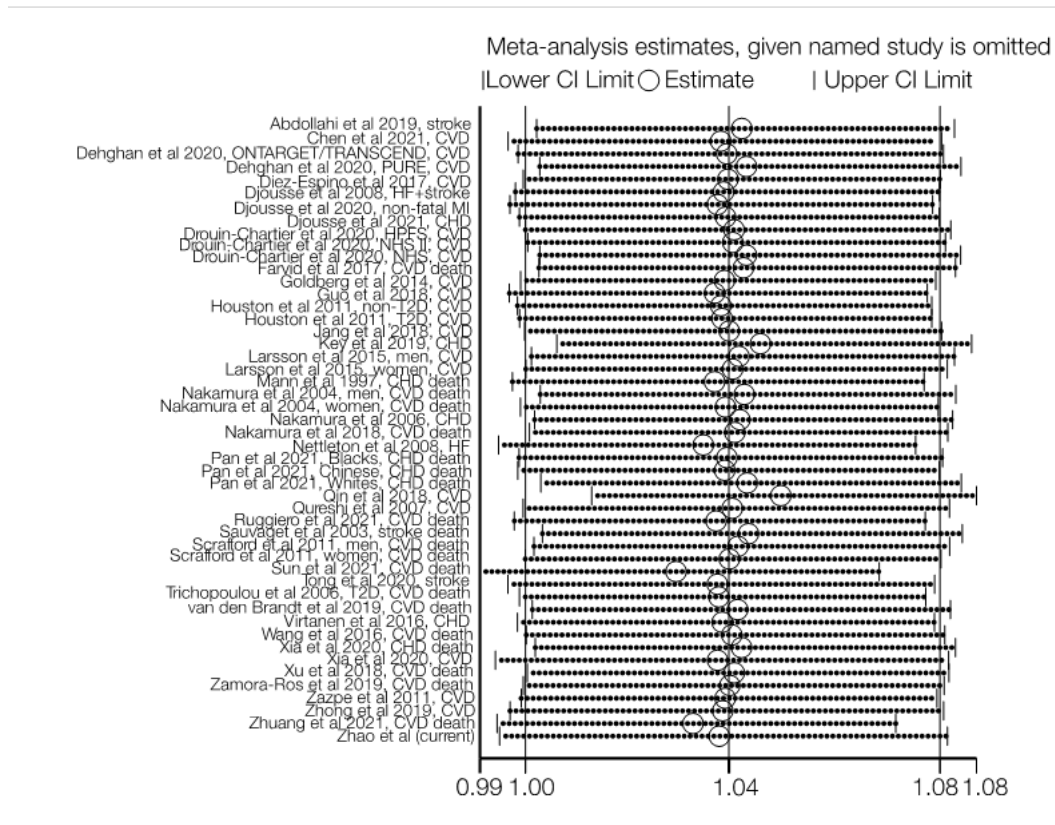

**Supplemental Figure III.** Influence analysis using forest plot for the meta-analysis on associations between egg consumption and risk of cardiovascular disease (including death from cardiovascular disease). Each dot reflects the pooled relative risk (95% confidence interval) following the exclusion of the given study using random-effects meta-analysis.

CHD=coronary heart disease; CVD=cardiovascular disease; HF=heart failure; i-stroke=ischemic stroke; MI: myocardial infarction; T2D=type 2 diabetes; RR= relative risk

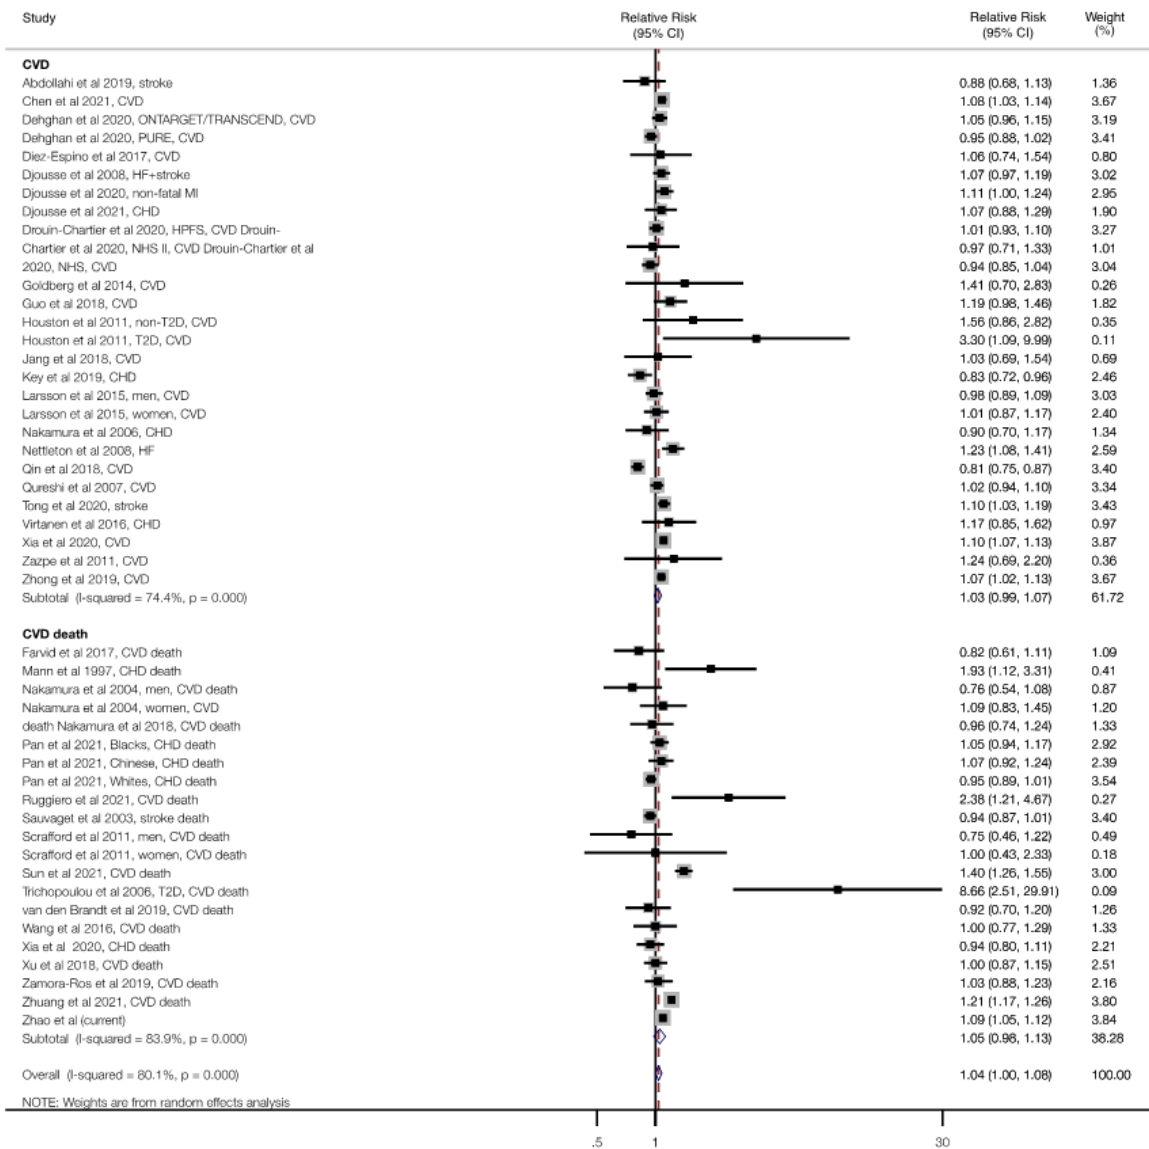

**Supplemental Figure IV.** Associations between egg consumption and cardiovascular disease risk for a one egg (50 grams) per day increase using random effects meta-analysis, stratified by incidence of incident CVD and CVD mortality. (P for interaction=0.58)

Squares reflect study-specific relative risks. Grey square areas are proportional to the individual study weight for the overall meta-analysis. Horizontal lines denote 95% CIs. I-squared refers to proportion of heterogeneity among studies.

Abbreviations: CHD=coronary heart disease; CVD=cardiovascular disease; HF=heart failure; MI: myocardial infarction; T2D=type 2 diabetes

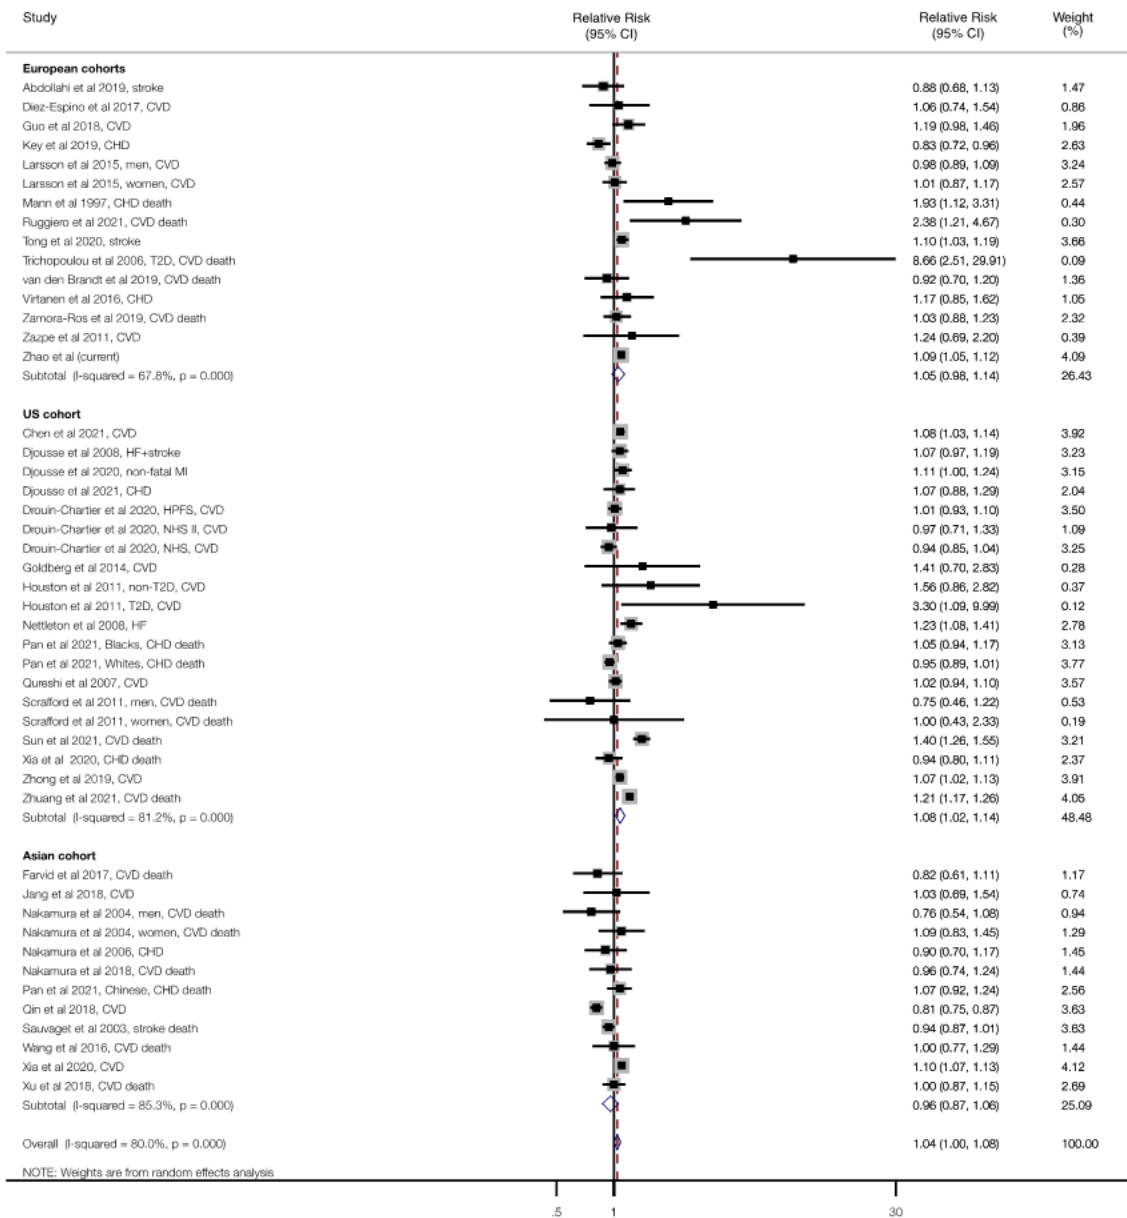

**Supplemental Figure V.** Associations between egg consumption and cardiovascular disease risk for one egg (50 grams) per day increase using random effects meta-analysis, stratified by geographical location. (P for interaction=0.02)

Squares reflect study-specific relative risk. Grey square areas are proportional to the individual study weight for the overall meta-analysis. Horizontal lines denote 95% CIs. I-squared refers to proportion of heterogeneity among studies. Abbreviations: CHD=coronary heart disease; CI=confidence interval; CVD=cardiovascular disease; HF=heart failure; i-stroke=ischemic stroke; MI: myocardial infarction; T2D=type 2 diabetes; US=United States
